# Supplementary material
Source: PubMed Central journal article supplement (PMC263856)

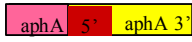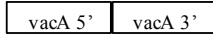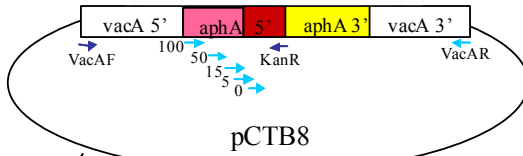

PCR product amplified using primers VacAF/KanR and ligated into pGEM-T-EZ

PCR product amplified using primers VacAR and either 0, 5, 15, 50, or 100, depending on desired size of identical repeat, and ligated into pGEM-T-EZ

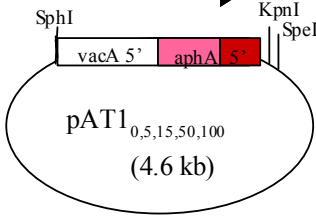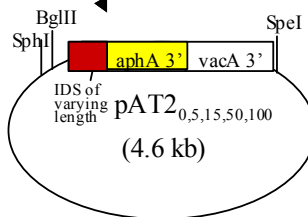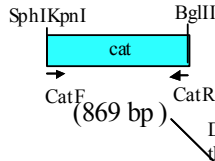

Digestion with BglII/SphI, then ligated with pATR2

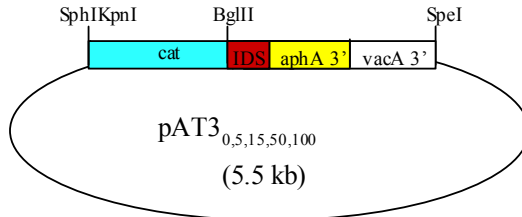

Digestion with KpnI/SpeI

Digestion with KpnI/SpeI

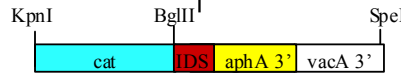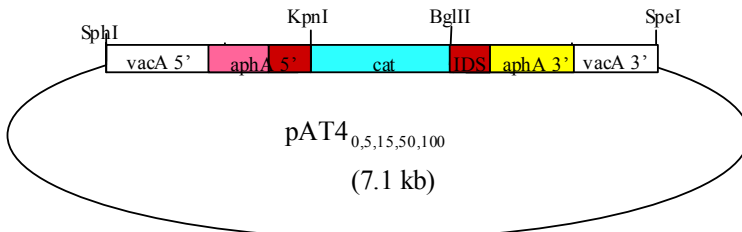

Supplement: pnas_100_23_13579__4.pdf [file pnas_100_23_13579__4.pdf]
