# Supplementary material
Source: PubMed Central journal article supplement (PMC263856)
Supplement: pnas_100_23_13579__5.pdf [file pnas_100_23_13579__5.pdf]

**Table 4. Characteristics of paired repeat sequences in *Helicobacter pylori* strain 26695**

| <b>Chromosome</b>  | <b>Chromosome</b>  | <b>Length of</b>    | <b>Distance</b>      | <b>Sequences</b>                    |
|--------------------|--------------------|---------------------|----------------------|-------------------------------------|
| <b>location of</b> | <b>location of</b> | <b>repeat</b>       | <b>between</b>       | <b>flanked by paired repeats</b>    |
| <b>repeat 1</b>    | <b>repeat 2</b>    | <b>sequence, bp</b> | <b>sequences, bp</b> | <b>in recombination hotspots*</b>   |
| 1                  | 8                  | 174                 | 7                    | Noncoding region upstream of HP0001 |
| 1                  | 15                 | 167                 | 14                   | Noncoding region upstream of HP0001 |
| 1                  | 22                 | 160                 | 21                   | Noncoding region upstream of HP0001 |
| 1                  | 29                 | 153                 | 28                   | Noncoding region upstream of HP0001 |
| 1                  | 36                 | 146                 | 35                   | Noncoding region upstream of HP0001 |
| 1                  | 43                 | 139                 | 42                   | Noncoding region upstream of HP0001 |
| 1                  | 50                 | 132                 | 49                   | Noncoding region upstream of HP0001 |
| 1                  | 57                 | 125                 | 56                   | Noncoding region upstream of HP0001 |
| 1                  | 64                 | 118                 | 63                   | Noncoding region upstream of HP0001 |
| 1                  | 71                 | 111                 | 70                   | Noncoding region upstream of HP0001 |
| 1                  | 78                 | 104                 | 77                   | Noncoding region upstream of HP0001 |
| 1                  | 85                 | 97                  | 84                   | Noncoding region upstream of HP0001 |
| 1                  | 92                 | 90                  | 91                   | Noncoding region upstream of HP0001 |
| 1                  | 99                 | 83                  | 98                   | Noncoding region upstream of HP0001 |
| 1                  | 106                | 76                  | 105                  | Noncoding region upstream of HP0001 |
| 1                  | 113                | 69                  | 112                  | Noncoding region upstream of HP0001 |
| 1                  | 120                | 62                  | 119                  | Noncoding region upstream of HP0001 |
| 1                  | 127                | 55                  | 126                  | Noncoding region upstream of HP0001 |
| 1                  | 134                | 48                  | 133                  | Noncoding region upstream of HP0001 |
| 1                  | 141                | 41                  | 140                  | Noncoding region upstream of HP0001 |
| 1                  | 148                | 34                  | 147                  | Noncoding region upstream of HP0001 |
| 1                  | 155                | 27                  | 154                  | Noncoding region upstream of HP0001 |
| 175                | 1665518            | 24                  | 2524                 | Noncoding region upstream of HP0001 |
| 3371               | 673020             | 24                  | 669649               |                                     |
| 5207               | 331826             | 27                  | 326619               |                                     |
| 5207               | 947552             | 27                  | 725522               |                                     |
| 5207               | 1317804            | 24                  | 355270               |                                     |
| 5251               | 947590             | 32                  | 725528               |                                     |
| 5298               | 23381              | 24                  | 18083                |                                     |

| Chromosome   | Chromosome   | Length of    | Distance      | Sequences                           |
|--------------|--------------|--------------|---------------|-------------------------------------|
| location of  | location of  | repeat       | between       |                                     |
| repeat 1     | repeat 2     | sequence, bp | repeat        | flanked by paired repeats           |
|              |              |              | sequences, bp | in recombination hotspots*          |
| 5425         | 332038       | 39           | 326613        |                                     |
| 5425         | 947764       | 39           | 725528        |                                     |
| 5425         | 1318022      | 39           | 355270        |                                     |
| 5487         | 779254       | 27           | 773767        |                                     |
| 5686         | 1244040      | 27           | 429513        |                                     |
| 6133         | 332758       | 31           | 326625        |                                     |
| 6942         | 25142        | 24           | 18200         |                                     |
| 7131         | 949581       | 43           | 725417        |                                     |
| 7210         | 780926       | 24           | 773716        |                                     |
| 7220         | 949665       | 42           | 725422        |                                     |
| 7332         | 949782       | 34           | 725417        |                                     |
| 22912        | 1503141      | 24           | 187638        |                                     |
| 23045        | 1503273      | 24           | 187639        |                                     |
| 23343        | 1243602      | 25           | 447608        |                                     |
| 23348        | 947604       | 26           | 743611        |                                     |
| 23799        | 239150       | 26           | 215351        |                                     |
| 24687        | 948925       | 27           | 743629        |                                     |
| 24903        | 949153       | 28           | 743617        |                                     |
| 25377        | 780893       | 27           | 755516        |                                     |
| 44280        | 1358632      | 26           | 353515        |                                     |
| 44360        | 1358710      | 24           | 353517        |                                     |
| 44955        | 932167       | 24           | 780655        |                                     |
| <b>62289</b> | <b>62520</b> | <b>99</b>    | <b>231</b>    | Noncoding region upstream of HP0058 |
| <b>62328</b> | <b>63412</b> | <b>28</b>    | <b>1084</b>   | HP0058 and 5' region of HP0059      |
| <b>62363</b> | <b>63447</b> | <b>81</b>    | <b>1084</b>   | HP0058 and 5' region of HP0059      |
| <b>62453</b> | <b>63537</b> | <b>30</b>    | <b>1084</b>   | HP0058 and 5' region of HP0059      |
| <b>62511</b> | <b>63364</b> | <b>25</b>    | <b>853</b>    | HP0058 and 5' region of HP0059      |
| <b>62559</b> | <b>63412</b> | <b>28</b>    | <b>853</b>    | HP0058 and 5' region of HP0059      |
| <b>62594</b> | <b>63447</b> | <b>25</b>    | <b>853</b>    | HP0058 and 5' region of HP0059      |
| 68029        | 68131        | 36           | 102           |                                     |
| 86222        | 86537        | 31           | 315           |                                     |
| 86915        | 634568       | 26           | 547653        |                                     |

| <b>Chromosome</b>  | <b>Chromosome</b>  | <b>Length of</b>    | <b>Distance</b>      | <b>Sequences</b>                                              |
|--------------------|--------------------|---------------------|----------------------|---------------------------------------------------------------|
| <b>location of</b> | <b>location of</b> | <b>repeat</b>       | <b>between</b>       | <b>flanked by paired repeats</b>                              |
| <b>repeat 1</b>    | <b>repeat 2</b>    | <b>sequence, bp</b> | <b>sequences, bp</b> | <b>in recombination hotspots*</b>                             |
| 86921              | 109416             | 59                  | 22495                |                                                               |
| 119865             | 903616             | 24                  | 783751               |                                                               |
| 119934             | 973650             | 28                  | 814151               |                                                               |
| <b>127931</b>      | <b>129383</b>      | <b>121</b>          | <b>1452</b>          | Hypothetical protein HP0118 and 3' region of HP0119           |
| <b>127931</b>      | <b>131053</b>      | <b>121</b>          | <b>3122</b>          | Hypothetical proteins HP0118, HP0119, and 3' region of HP0119 |
| 127931             | 1256746            | 61                  | 539052               |                                                               |
| 127931             | 1258168            | 121                 | 537630               |                                                               |
| 127997             | 1256812            | 55                  | 539052               |                                                               |
| 128053             | 1258290            | 31                  | 537630               |                                                               |
| <b>128076</b>      | <b>129540</b>      | <b>116</b>          | <b>1464</b>          | 5' region of HP0118 and 3' region of HP0119                   |
| <b>128076</b>      | <b>131210</b>      | <b>116</b>          | <b>3134</b>          | 5' region of HP0118, HP0119 and 3' region of HP0120           |
| 128076             | 1256903            | 43                  | 539040               |                                                               |
| 128083             | 1258321            | 79                  | 537629               |                                                               |
| 128120             | 1256947            | 27                  | 539040               |                                                               |
| 128163             | 1256990            | 29                  | 539040               |                                                               |
| 128196             | 1257023            | 32                  | 539040               |                                                               |
| <b>128204</b>      | <b>129668</b>      | <b>68</b>           | <b>1464</b>          | 5' region of HP0118 and 3' region of HP0119                   |
| <b>128204</b>      | <b>131338</b>      | <b>68</b>           | <b>3134</b>          | 5' region of HP0118, HP0119 and 3' region of HP0120           |
| 128204             | 1258442            | 24                  | 537629               |                                                               |
| 128242             | 1257069            | 255                 | 539040               |                                                               |
| 128249             | 1258487            | 52                  | 537629               |                                                               |
| <b>128273</b>      | <b>129737</b>      | <b>27</b>           | <b>1464</b>          | 5' region of HP0118 and 3' region of HP0119                   |
| <b>128273</b>      | <b>131407</b>      | <b>27</b>           | <b>3134</b>          | 5' region of HP0118, HP0119 and 3' region of HP0120           |
| <b>128304</b>      | <b>129768</b>      | <b>93</b>           | <b>1464</b>          | 5' region of HP0118 and 3' region of HP0119                   |
| <b>128304</b>      | <b>131438</b>      | <b>93</b>           | <b>3134</b>          | 5' region of HP0118, HP0119 and 3' region of HP0120           |
| 128319             | 1258557            | 78                  | 537629               |                                                               |

| <b>Chromosome</b>  | <b>Chromosome</b>  | <b>Length of</b>    | <b>Distance</b>      | <b>Sequences</b>                                    |
|--------------------|--------------------|---------------------|----------------------|-----------------------------------------------------|
| <b>location of</b> | <b>location of</b> | <b>repeat</b>       | <b>between</b>       |                                                     |
| <b>repeat 1</b>    | <b>repeat 2</b>    | <b>sequence, bp</b> | <b>sequences, bp</b> | <b>flanked by paired repeats</b>                    |
|                    |                    |                     |                      | <b>in recombination hotspots*</b>                   |
| <b>128426</b>      | <b>129890</b>      | <b>40</b>           | <b>1464</b>          | 5' region of HP0118 and 3' region of HP0119         |
| <b>128426</b>      | <b>131560</b>      | <b>40</b>           | <b>3134</b>          | 5' region of HP0118, HP0119 and 3' region of HP0120 |
| 128441             | 1258679            | 25                  | 537629               |                                                     |
| <b>128492</b>      | <b>128513</b>      | <b>82</b>           | <b>21</b>            | Internal to HP0118                                  |
| <b>128492</b>      | <b>128534</b>      | <b>61</b>           | <b>42</b>            | Internal to HP0118                                  |
| <b>128492</b>      | <b>128555</b>      | <b>40</b>           | <b>63</b>            | Internal to HP0118                                  |
| <b>128610</b>      | <b>129990</b>      | <b>29</b>           | <b>1380</b>          | 5' region of HP0118 and 3' region of HP0119         |
| 128610             | 1257395            | 414                 | 539082               |                                                     |
| <b>128615</b>      | <b>128669</b>      | <b>24</b>           | <b>54</b>            | Internal to HP0118                                  |
| 128615             | 1257454            | 24                  | 539028               |                                                     |
| <b>128640</b>      | <b>130020</b>      | <b>32</b>           | <b>1380</b>          | 5' region of HP0118 and 3' region of HP0119         |
| <b>128640</b>      | <b>130158</b>      | <b>39</b>           | <b>1518</b>          | 5' region of HP0118 and 3' region of HP0119         |
| <b>128640</b>      | <b>130296</b>      | <b>39</b>           | <b>1656</b>          | 5' region of HP0118 and 3' region of HP0119         |
| <b>128669</b>      | <b>129995</b>      | <b>42</b>           | <b>1326</b>          | 5' region of HP0118 and 3' region of HP0119         |
| 128669             | 1257400            | 24                  | 539136               |                                                     |
| <b>128672</b>      | <b>130136</b>      | <b>39</b>           | <b>1464</b>          | 5' region of HP0118 and 3' region of HP0119         |
| <b>128672</b>      | <b>130274</b>      | <b>39</b>           | <b>1602</b>          | 5' region of HP0118 and 3' region of HP0119         |
| <b>128762</b>      | <b>131893</b>      | <b>26</b>           | <b>3131</b>          | 5' region of HP0118, HP0119 and 3' region of HP0120 |
| 128763             | 1258851            | 95                  | 537779               |                                                     |
| <b>128789</b>      | <b>131920</b>      | <b>175</b>          | <b>3131</b>          | 5' region of HP0118, HP0119 and HP0120              |
| 129025             | 1257810            | 133                 | 539082               |                                                     |
| <b>129041</b>      | <b>132172</b>      | <b>89</b>           | <b>3131</b>          | 5' region of HP0118, HP0119 and HP0120              |
| 129087             | 1259174            | 55                  | 537780               |                                                     |
| <b>129151</b>      | <b>130821</b>      | <b>780</b>          | <b>1670</b>          | HP0119 and 5' region of HP0120                      |
| 129151             | 1259238            | 86                  | 537780               |                                                     |
| 129159             | 1257944            | 349                 | 539082               |                                                     |
| 129238             | 1259325            | 53                  | 537780               |                                                     |
| 129372             | 1256735            | 72                  | 540504               |                                                     |
| 129449             | 1256812            | 59                  | 540504               |                                                     |
| 129539             | 1256902            | 44                  | 540504               |                                                     |

| Chromosome    | Chromosome    | Length of    | Distance      | Sequences                  |
|---------------|---------------|--------------|---------------|----------------------------|
| location of   | location of   | repeat       | between       |                            |
| repeat 1      | repeat 2      | sequence, bp | repeat        | flanked by paired repeats  |
|               |               |              | sequences, bp | in recombination hotspots* |
| 129547        | 1258321       | 79           | 539093        |                            |
| 129584        | 1256947       | 27           | 540504        |                            |
| 129627        | 1256990       | 30           | 540504        |                            |
| 129663        | 1258437       | 29           | 539093        |                            |
| 129668        | 1257031       | 24           | 540504        |                            |
| 129706        | 1257069       | 30           | 540504        |                            |
| 129737        | 1257100       | 27           | 540504        |                            |
| 129737        | 1258511       | 27           | 539093        |                            |
| 129768        | 1257131       | 93           | 540504        |                            |
| 129783        | 1258557       | 107          | 539093        |                            |
| 129890        | 1257253       | 40           | 540504        |                            |
| 129905        | 1258679       | 27           | 539093        |                            |
| <b>129961</b> | <b>130174</b> | <b>28</b>    | <b>213</b>    | Internal to HP0119         |
| <b>129961</b> | <b>130312</b> | <b>28</b>    | <b>351</b>    | Internal to HP0119         |
| <b>129962</b> | <b>130058</b> | <b>27</b>    | <b>96</b>     | Internal to HP0119         |
| <b>129962</b> | <b>130079</b> | <b>27</b>    | <b>117</b>    | Internal to HP0119         |
| <b>129962</b> | <b>130100</b> | <b>27</b>    | <b>138</b>    | Internal to HP0119         |
| <b>129962</b> | <b>130196</b> | <b>27</b>    | <b>234</b>    | Internal to HP0119         |
| <b>129962</b> | <b>130217</b> | <b>27</b>    | <b>255</b>    | Internal to HP0119         |
| <b>129962</b> | <b>130238</b> | <b>27</b>    | <b>276</b>    | Internal to HP0119         |
| <b>129962</b> | <b>130334</b> | <b>27</b>    | <b>372</b>    | Internal to HP0119         |
| <b>129962</b> | <b>130355</b> | <b>27</b>    | <b>393</b>    | Internal to HP0119         |
| 129963        | 1257326       | 30           | 540504        |                            |
| 129987        | 1257392       | 32           | 540462        |                            |
| 129995        | 1257454       | 42           | 540408        |                            |
| <b>129998</b> | <b>130136</b> | <b>54</b>    | <b>138</b>    | Internal to HP0119         |
| <b>129998</b> | <b>130274</b> | <b>54</b>    | <b>276</b>    | Internal to HP0119         |
| 130020        | 1257425       | 32           | 540462        |                            |
| <b>130053</b> | <b>130074</b> | <b>58</b>    | <b>21</b>     | Internal to HP0119         |
| <b>130053</b> | <b>130095</b> | <b>37</b>    | <b>42</b>     | Internal to HP0119         |
| <b>130053</b> | <b>130191</b> | <b>196</b>   | <b>138</b>    | Internal to HP0119         |
| <b>130053</b> | <b>130212</b> | <b>58</b>    | <b>159</b>    | Internal to HP0119         |

| <b>Chromosome</b>  | <b>Chromosome</b>  | <b>Length of</b>    | <b>Distance</b>      | <b>Sequences</b>                            |
|--------------------|--------------------|---------------------|----------------------|---------------------------------------------|
| <b>location of</b> | <b>location of</b> | <b>repeat</b>       | <b>between</b>       | <b>flanked by paired repeats</b>            |
| <b>repeat 1</b>    | <b>repeat 2</b>    | <b>sequence, bp</b> | <b>sequences, bp</b> | <b>in recombination hotspots*</b>           |
| 130053             | 130233             | 37                  | 180                  | Internal to HP0119                          |
| 130053             | 130329             | 58                  | 276                  | Internal to HP0119                          |
| 130053             | 130350             | 37                  | 297                  | Internal to HP0119                          |
| 130058             | 130175             | 74                  | 117                  | Internal to HP0119                          |
| 130058             | 130313             | 77                  | 255                  | Internal to HP0119                          |
| 130059             | 1257326            | 26                  | 540600               |                                             |
| 130062             | 131699             | 27                  | 1637                 | 5' region of HP0119 and 3' region of HP0120 |
| 130079             | 130175             | 53                  | 96                   | Internal to HP0119                          |
| 130079             | 130313             | 53                  | 234                  | Internal to HP0119                          |
| 130080             | 1257326            | 26                  | 540621               |                                             |
| 130083             | 131699             | 27                  | 1616                 | 5' region of HP0119 and 3' region of HP0120 |
| 130100             | 130175             | 32                  | 75                   | Internal to HP0119                          |
| 130100             | 130313             | 32                  | 213                  | Internal to HP0119                          |
| 130101             | 1257326            | 26                  | 540642               |                                             |
| 130104             | 131699             | 27                  | 1595                 | 5' region of HP0119 and 3' region of HP0120 |
| 130136             | 1257457            | 39                  | 540546               |                                             |
| 130158             | 1257425            | 39                  | 540600               |                                             |
| 130175             | 130196             | 74                  | 21                   | Internal to HP0119                          |
| 130175             | 130217             | 53                  | 42                   | Internal to HP0119                          |
| 130175             | 130238             | 32                  | 63                   | Internal to HP0119                          |
| 130175             | 130334             | 53                  | 159                  | Internal to HP0119                          |
| 130175             | 130355             | 32                  | 180                  | Internal to HP0119                          |
| 130176             | 1257326            | 26                  | 540717               |                                             |
| 130179             | 131699             | 27                  | 1520                 | 5' region of HP0119 and 3' region of HP0120 |
| 130196             | 130313             | 77                  | 117                  | Internal to HP0119                          |
| 130197             | 1257326            | 26                  | 540738               |                                             |
| 130200             | 131699             | 27                  | 1499                 | 5' region of HP0119 and 3' region of HP0120 |
| 130217             | 130313             | 53                  | 96                   | Internal to HP0119                          |
| 130218             | 1257326            | 26                  | 540759               |                                             |
| 130221             | 131699             | 27                  | 1478                 | 5' region of HP0119 and 3' region of HP0120 |
| 130238             | 130313             | 32                  | 75                   | Internal to HP0119                          |
| 130239             | 1257326            | 26                  | 540780               |                                             |

| <b>Chromosome</b>  | <b>Chromosome</b>  | <b>Length of</b>    | <b>Distance</b>      | <b>Sequences</b>                            |
|--------------------|--------------------|---------------------|----------------------|---------------------------------------------|
| <b>location of</b> | <b>location of</b> | <b>repeat</b>       | <b>between</b>       | <b>flanked by paired repeats</b>            |
| <b>repeat 1</b>    | <b>repeat 2</b>    | <b>sequence, bp</b> | <b>sequences, bp</b> | <b>in recombination hotspots*</b>           |
| <b>130242</b>      | <b>131699</b>      | <b>27</b>           | <b>1457</b>          | 5' region of HP0119 and 3' region of HP0120 |
| 130274             | 1257457            | 39                  | 540684               |                                             |
| 130296             | 1257425            | 39                  | 540738               |                                             |
| <b>130313</b>      | <b>130334</b>      | <b>53</b>           | <b>21</b>            | Internal to HP0119                          |
| <b>130313</b>      | <b>130355</b>      | <b>32</b>           | <b>42</b>            | Internal to HP0119                          |
| 130314             | 1257326            | 26                  | 540855               |                                             |
| <b>130317</b>      | <b>131699</b>      | <b>27</b>           | <b>1382</b>          | 5' region of HP0119 and 3' region of HP0120 |
| 130335             | 1257326            | 26                  | 540876               |                                             |
| <b>130338</b>      | <b>131699</b>      | <b>27</b>           | <b>1361</b>          | 5' region of HP0119 and 3' region of HP0120 |
| 130356             | 1257326            | 26                  | 540897               |                                             |
| <b>130359</b>      | <b>131699</b>      | <b>27</b>           | <b>1340</b>          | 5' region of HP0119 and 3' region of HP0120 |
| <b>130419</b>      | <b>131822</b>      | <b>31</b>           | <b>1403</b>          | 5' region of HP0119 and 3' region of HP0120 |
| 130419             | 1258779            | 31                  | 539507               |                                             |
| 130797             | 1259214            | 110                 | 539450               |                                             |
| 130829             | 1257944            | 349                 | 540752               |                                             |
| 130908             | 1259325            | 53                  | 539450               |                                             |
| 131042             | 1256735            | 72                  | 542174               |                                             |
| 131119             | 1256812            | 59                  | 542174               |                                             |
| 131209             | 1256902            | 44                  | 542174               |                                             |
| 131217             | 1258321            | 79                  | 540763               |                                             |
| 131254             | 1256947            | 27                  | 542174               |                                             |
| 131297             | 1256990            | 30                  | 542174               |                                             |
| 131333             | 1258437            | 29                  | 540763               |                                             |
| 131338             | 1257031            | 24                  | 542174               |                                             |
| 131376             | 1257069            | 30                  | 542174               |                                             |
| 131407             | 1257100            | 27                  | 542174               |                                             |
| 131407             | 1258511            | 27                  | 540763               |                                             |
| 131438             | 1257131            | 93                  | 542174               |                                             |
| 131453             | 1258557            | 107                 | 540763               |                                             |
| 131560             | 1257253            | 40                  | 542174               |                                             |
| 131575             | 1258679            | 26                  | 540763               |                                             |
| 131801             | 1258758            | 64                  | 540910               |                                             |

| <b>Chromosome</b>  | <b>Chromosome</b>  | <b>Length of</b>    | <b>Distance</b>      | <b>Sequences</b>                            |
|--------------------|--------------------|---------------------|----------------------|---------------------------------------------|
| <b>location of</b> | <b>location of</b> | <b>repeat</b>       | <b>between</b>       | <b>flanked by paired repeats</b>            |
| <b>repeat 1</b>    | <b>repeat 2</b>    | <b>sequence, bp</b> | <b>sequences, bp</b> | <b>in recombination hotspots*</b>           |
| 131893             | 1257547            | 26                  | 542213               |                                             |
| 131894             | 1258851            | 25                  | 540910               |                                             |
| 131920             | 1257574            | 175                 | 542213               |                                             |
| 131920             | 1258877            | 69                  | 540910               |                                             |
| 132107             | 1259064            | 44                  | 540910               |                                             |
| 132156             | 1259113            | 33                  | 540910               |                                             |
| 132172             | 1257826            | 89                  | 542213               |                                             |
| 132218             | 1259174            | 43                  | 540911               |                                             |
| 141586             | 968574             | 26                  | 826988               |                                             |
| <b>150633</b>      | <b>152342</b>      | <b>24</b>           | <b>1709</b>          | 3' region of HP0140 and 5' region of HP0141 |
| <b>150674</b>      | <b>152383</b>      | <b>57</b>           | <b>1709</b>          | 3' region of HP0140 and 5' region of HP0141 |
| <b>150831</b>      | <b>152540</b>      | <b>29</b>           | <b>1709</b>          | 3' region of HP0140 and 5' region of HP0141 |
| <b>151833</b>      | <b>153548</b>      | <b>31</b>           | <b>1715</b>          | 3' region of HP0140 and 5' region of HP0141 |
| 169078             | 169186             | 28                  | 108                  |                                             |
| 169970             | 968560             | 28                  | 798590               |                                             |
| 169974             | 454240             | 25                  | 284266               |                                             |
| 169974             | 1050962            | 25                  | 786879               |                                             |
| 170543             | 1524501            | 27                  | 313909               |                                             |
| 170578             | 466527             | 56                  | 295949               |                                             |
| 170597             | 1524560            | 37                  | 313904               |                                             |
| 177351             | 177363             | 33                  | 12                   |                                             |
| 186335             | 1536637            | 26                  | 317565               |                                             |
| 218426             | 1158879            | 24                  | 727414               |                                             |
| 235298             | 1243908            | 29                  | 659257               |                                             |
| 235355             | 1243965            | 29                  | 659257               |                                             |
| 235421             | 1244031            | 32                  | 659257               |                                             |
| 240152             | 780960             | 33                  | 540808               |                                             |
| 267029             | 1044563            | 45                  | 777534               |                                             |
| 267075             | 1044609            | 166                 | 777534               |                                             |
| 267281             | 1044821            | 30                  | 777540               |                                             |
| 268763             | 1044855            | 54                  | 776092               |                                             |
| 268818             | 1044910            | 41                  | 776092               |                                             |



| <b>Chromosome</b>  | <b>Chromosome</b>  | <b>Length of</b>    | <b>Distance</b>      | <b>Sequences</b>                  |
|--------------------|--------------------|---------------------|----------------------|-----------------------------------|
| <b>location of</b> | <b>location of</b> | <b>repeat</b>       | <b>between</b>       | <b>flanked by paired repeats</b>  |
| <b>repeat 1</b>    | <b>repeat 2</b>    | <b>sequence, bp</b> | <b>sequences, bp</b> | <b>in recombination hotspots*</b> |
| 268895             | 1044987            | 33                  | 776092               |                                   |
| 268947             | 1045039            | 28                  | 776092               |                                   |
| 330497             | 945692             | 25                  | 615195               |                                   |
| 330498             | 946347             | 24                  | 615849               |                                   |
| 330960             | 946684             | 243                 | 615724               |                                   |
| 331204             | 946928             | 311                 | 615724               |                                   |
| 331314             | 331510             | 28                  | 196                  |                                   |
| 331479             | 1317454            | 31                  | 681892               |                                   |
| 331510             | 947038             | 28                  | 615528               |                                   |
| 331523             | 947248             | 100                 | 615725               |                                   |
| 331523             | 1317500            | 145                 | 681890               |                                   |
| 331624             | 947349             | 29                  | 615725               |                                   |
| 331668             | 1317646            | 182                 | 681889               |                                   |
| 331671             | 947398             | 81                  | 615727               |                                   |
| 331745             | 947471             | 127                 | 615726               |                                   |
| 331854             | 1317838            | 522                 | 681883               |                                   |
| 331878             | 779032             | 26                  | 447154               |                                   |
| 331891             | 947617             | 29                  | 615726               |                                   |
| 331924             | 947650             | 40                  | 615726               |                                   |
| 331984             | 947710             | 125                 | 615726               |                                   |
| 332122             | 947848             | 29                  | 615726               |                                   |
| 332167             | 947893             | 59                  | 615726               |                                   |
| 332227             | 947953             | 29                  | 615726               |                                   |
| 332305             | 948031             | 71                  | 615726               |                                   |
| 332377             | 948103             | 342                 | 615726               |                                   |
| 332377             | 1318361            | 342                 | 681883               |                                   |
| 332944             | 948631             | 133                 | 615687               |                                   |
| 333745             | 1319693            | 28                  | 681919               |                                   |
| 333790             | 1319738            | 34                  | 681919               |                                   |
| 333825             | 1319773            | 403                 | 681919               |                                   |
| 333859             | 949477             | 47                  | 615618               |                                   |
| 334006             | 949624             | 30                  | 615618               |                                   |

| Chromosome    | Chromosome    | Length of    | Distance      | Sequences                  |
|---------------|---------------|--------------|---------------|----------------------------|
| location of   | location of   | repeat       | between       |                            |
| repeat 1      | repeat 2      | sequence, bp | repeat        | flanked by paired repeats  |
|               |               |              | sequences, bp | in recombination hotspots* |
| 334211        | 949800        | 58           | 615589        |                            |
| <b>338156</b> | <b>338552</b> | <b>29</b>    | <b>396</b>    | Internal to HP0322         |
| <b>338674</b> | <b>338698</b> | <b>74</b>    | <b>24</b>     | Internal to HP0322         |
| <b>338674</b> | <b>338722</b> | <b>50</b>    | <b>48</b>     | Internal to HP0322         |
| <b>338674</b> | <b>338746</b> | <b>26</b>    | <b>72</b>     | Internal to HP0322         |
| 381023        | 1521950       | 46           | 526940        |                            |
| 382073        | 1523120       | 24           | 526820        |                            |
| 382110        | 1523157       | 36           | 526820        |                            |
| 382575        | 765466        | 27           | 382891        |                            |
| 382722        | 1523781       | 24           | 526808        |                            |
| 382808        | 1523873       | 44           | 526802        |                            |
| 382903        | 1523968       | 51           | 526802        |                            |
| 383029        | 1524094       | 35           | 526802        |                            |
| 389932        | 389953        | 24           | 21            |                            |
| 425453        | 1068545       | 523          | 643092        |                            |
| 425470        | 593779        | 31           | 168309        |                            |
| 425509        | 593818        | 61           | 168309        |                            |
| 425977        | 1069069       | 29           | 643092        |                            |
| 426006        | 1069097       | 34           | 643091        |                            |
| 426038        | 1069130       | 199          | 643092        |                            |
| 426238        | 1069330       | 151          | 643092        |                            |
| 426389        | 1069480       | 111          | 643091        |                            |
| 426501        | 1069592       | 929          | 643091        |                            |
| <b>444403</b> | <b>444411</b> | <b>80</b>    | <b>8</b>      | Internal to HP0427         |
| <b>444403</b> | <b>444419</b> | <b>72</b>    | <b>16</b>     | Internal to HP0427         |
| <b>444403</b> | <b>444427</b> | <b>64</b>    | <b>24</b>     | Internal to HP0427         |
| <b>444403</b> | <b>444435</b> | <b>56</b>    | <b>32</b>     | Internal to HP0427         |
| <b>444403</b> | <b>444443</b> | <b>48</b>    | <b>40</b>     | Internal to HP0427         |
| <b>444403</b> | <b>444451</b> | <b>40</b>    | <b>48</b>     | Internal to HP0427         |
| <b>444403</b> | <b>444459</b> | <b>32</b>    | <b>56</b>     | Internal to HP0427         |
| <b>444403</b> | <b>444467</b> | <b>24</b>    | <b>64</b>     | Internal to HP0427         |
| <b>444531</b> | <b>444539</b> | <b>27</b>    | <b>8</b>      | Internal to HP0427         |

| Chromosome  | Chromosome  | Length of    | Distance      | Sequences                             |
|-------------|-------------|--------------|---------------|---------------------------------------|
| location of | location of | repeat       | between       |                                       |
| repeat 1    | repeat 2    | sequence, bp | repeat        | flanked by paired repeats             |
|             |             |              | sequences, bp | in recombination hotspots*            |
| 444764      | 444780      | 78           | 16            | Noncoding region downstream of HP0427 |
| 444764      | 444796      | 62           | 32            | Noncoding region downstream of HP0427 |
| 444764      | 444812      | 46           | 48            | Noncoding region downstream of HP0427 |
| 444764      | 444828      | 30           | 64            | Noncoding region downstream of HP0427 |
| 448468      | 1045074     | 372          | 596606        |                                       |
| 448841      | 1045447     | 82           | 596606        |                                       |
| 448924      | 1045530     | 122          | 596606        |                                       |
| 448924      | 1508330     | 24           | 608461        |                                       |
| 452617      | 453350      | 24           | 733           |                                       |
| 454237      | 1050959     | 1620         | 596722        |                                       |
| 454240      | 968564      | 24           | 514324        |                                       |
| 455858      | 1052580     | 270          | 596722        |                                       |
| 466486      | 1524505     | 35           | 609848        |                                       |
| 466546      | 1524560     | 38           | 609853        |                                       |
| 499022      | 987082      | 1108         | 488060        |                                       |
| 555845      | 556169      | 100          | 324           | Internal to HP0527 ( <i>cagY</i> )    |
| 555861      | 556623      | 56           | 762           | Internal to HP0527 ( <i>cagY</i> )    |
| 555872      | 556748      | 29           | 876           | Internal to HP0527 ( <i>cagY</i> )    |
| 555872      | 556862      | 45           | 990           | Internal to HP0527 ( <i>cagY</i> )    |
| 555872      | 557300      | 29           | 1428          | Internal to HP0527 ( <i>cagY</i> )    |
| 555872      | 557414      | 29           | 1542          | Internal to HP0527 ( <i>cagY</i> )    |
| 555872      | 557852      | 29           | 1980          | Internal to HP0527 ( <i>cagY</i> )    |
| 555878      | 556433      | 71           | 555           | Internal to HP0527 ( <i>cagY</i> )    |
| 555878      | 557627      | 50           | 1749          | Internal to HP0527 ( <i>cagY</i> )    |
| 555946      | 556270      | 126          | 324           | Internal to HP0527 ( <i>cagY</i> )    |
| 556185      | 556623      | 56           | 438           | Internal to HP0527 ( <i>cagY</i> )    |
| 556196      | 556748      | 29           | 552           | Internal to HP0527 ( <i>cagY</i> )    |
| 556196      | 556862      | 45           | 666           | Internal to HP0527 ( <i>cagY</i> )    |
| 556196      | 557300      | 29           | 1104          | Internal to HP0527 ( <i>cagY</i> )    |
| 556196      | 557414      | 29           | 1218          | Internal to HP0527 ( <i>cagY</i> )    |
| 556196      | 557852      | 29           | 1656          | Internal to HP0527 ( <i>cagY</i> )    |
| 556202      | 556433      | 67           | 231           | Internal to HP0527 ( <i>cagY</i> )    |

| Chromosome  | Chromosome  | Length of    | Distance      | Sequences                          |
|-------------|-------------|--------------|---------------|------------------------------------|
| location of | location of | repeat       | between       |                                    |
| repeat 1    | repeat 2    | sequence, bp | repeat        | flanked by paired repeats          |
|             |             |              | sequences, bp | in recombination hotspots*         |
| 556202      | 557627      | 50           | 1425          | Internal to HP0527 ( <i>cagY</i> ) |
| 556397      | 556832      | 35           | 435           | Internal to HP0527 ( <i>cagY</i> ) |
| 556398      | 557823      | 34           | 1425          | Internal to HP0527 ( <i>cagY</i> ) |
| 556403      | 557597      | 80           | 1194          | Internal to HP0527 ( <i>cagY</i> ) |
| 556411      | 557719      | 45           | 1308          | Internal to HP0527 ( <i>cagY</i> ) |
| 556425      | 557181      | 31           | 756           | Internal to HP0527 ( <i>cagY</i> ) |
| 556433      | 556640      | 39           | 207           | Internal to HP0527 ( <i>cagY</i> ) |
| 556433      | 556868      | 39           | 435           | Internal to HP0527 ( <i>cagY</i> ) |
| 556484      | 557792      | 26           | 1308          | Internal to HP0527 ( <i>cagY</i> ) |
| 556505      | 557492      | 44           | 987           | Internal to HP0527 ( <i>cagY</i> ) |
| 556511      | 556946      | 90           | 435           | Internal to HP0527 ( <i>cagY</i> ) |
| 556571      | 557558      | 29           | 987           | Internal to HP0527 ( <i>cagY</i> ) |
| 556571      | 557996      | 29           | 1425          | Internal to HP0527 ( <i>cagY</i> ) |
| 556571      | 558203      | 30           | 1632          | Internal to HP0527 ( <i>cagY</i> ) |
| 556571      | 558425      | 30           | 1854          | Internal to HP0527 ( <i>cagY</i> ) |
| 556602      | 557037      | 37           | 435           | Internal to HP0527 ( <i>cagY</i> ) |
| 556602      | 557589      | 31           | 987           | Internal to HP0527 ( <i>cagY</i> ) |
| 556634      | 556748      | 29           | 114           | Internal to HP0527 ( <i>cagY</i> ) |
| 556634      | 556862      | 71           | 228           | Internal to HP0527 ( <i>cagY</i> ) |
| 556634      | 557300      | 29           | 666           | Internal to HP0527 ( <i>cagY</i> ) |
| 556634      | 557414      | 29           | 780           | Internal to HP0527 ( <i>cagY</i> ) |
| 556634      | 557852      | 29           | 1218          | Internal to HP0527 ( <i>cagY</i> ) |
| 556640      | 557627      | 39           | 987           | Internal to HP0527 ( <i>cagY</i> ) |
| 556730      | 557282      | 80           | 552           | Internal to HP0527 ( <i>cagY</i> ) |
| 556730      | 557396      | 86           | 666           | Internal to HP0527 ( <i>cagY</i> ) |
| 556737      | 556851      | 40           | 114           | Internal to HP0527 ( <i>cagY</i> ) |
| 556737      | 557841      | 46           | 1104          | Internal to HP0527 ( <i>cagY</i> ) |
| 556754      | 557189      | 29           | 435           | Internal to HP0527 ( <i>cagY</i> ) |
| 556754      | 557741      | 29           | 987           | Internal to HP0527 ( <i>cagY</i> ) |
| 556784      | 557105      | 26           | 321           | Internal to HP0527 ( <i>cagY</i> ) |
| 556784      | 557771      | 26           | 987           | Internal to HP0527 ( <i>cagY</i> ) |
| 556785      | 557220      | 31           | 435           | Internal to HP0527 ( <i>cagY</i> ) |

| Chromosome  | Chromosome  | Length of    | Distance      | Sequences                          |
|-------------|-------------|--------------|---------------|------------------------------------|
| location of | location of | repeat       | between       |                                    |
| repeat 1    | repeat 2    | sequence, bp | repeat        | flanked by paired repeats          |
|             |             |              | sequences, bp | in recombination hotspots*         |
| 556811      | 557132      | 32           | 321           | Internal to HP0527 ( <i>cagY</i> ) |
| 556811      | 557363      | 39           | 552           | Internal to HP0527 ( <i>cagY</i> ) |
| 556817      | 557690      | 26           | 873           | Internal to HP0527 ( <i>cagY</i> ) |
| 556833      | 557823      | 58           | 990           | Internal to HP0527 ( <i>cagY</i> ) |
| 556838      | 557597      | 29           | 759           | Internal to HP0527 ( <i>cagY</i> ) |
| 556851      | 557289      | 40           | 438           | Internal to HP0527 ( <i>cagY</i> ) |
| 556851      | 557403      | 40           | 552           | Internal to HP0527 ( <i>cagY</i> ) |
| 556868      | 557627      | 39           | 759           | Internal to HP0527 ( <i>cagY</i> ) |
| 556910      | 557900      | 40           | 990           | Internal to HP0527 ( <i>cagY</i> ) |
| 556946      | 557498      | 38           | 552           | Internal to HP0527 ( <i>cagY</i> ) |
| 557006      | 557558      | 29           | 552           | Internal to HP0527 ( <i>cagY</i> ) |
| 557006      | 557996      | 29           | 990           | Internal to HP0527 ( <i>cagY</i> ) |
| 557006      | 558203      | 35           | 1197          | Internal to HP0527 ( <i>cagY</i> ) |
| 557006      | 558425      | 32           | 1419          | Internal to HP0527 ( <i>cagY</i> ) |
| 557036      | 557588      | 32           | 552           | Internal to HP0527 ( <i>cagY</i> ) |
| 557081      | 557195      | 24           | 114           | Internal to HP0527 ( <i>cagY</i> ) |
| 557081      | 557747      | 65           | 666           | Internal to HP0527 ( <i>cagY</i> ) |
| 557081      | 557864      | 44           | 783           | Internal to HP0527 ( <i>cagY</i> ) |
| 557105      | 557336      | 59           | 231           | Internal to HP0527 ( <i>cagY</i> ) |
| 557105      | 557450      | 26           | 345           | Internal to HP0527 ( <i>cagY</i> ) |
| 557106      | 557220      | 25           | 114           | Internal to HP0527 ( <i>cagY</i> ) |
| 557138      | 557690      | 37           | 552           | Internal to HP0527 ( <i>cagY</i> ) |
| 557181      | 557619      | 31           | 438           | Internal to HP0527 ( <i>cagY</i> ) |
| 557181      | 557733      | 38           | 552           | Internal to HP0527 ( <i>cagY</i> ) |
| 557189      | 557306      | 29           | 117           | Internal to HP0527 ( <i>cagY</i> ) |
| 557189      | 557420      | 29           | 231           | Internal to HP0527 ( <i>cagY</i> ) |
| 557189      | 557858      | 30           | 669           | Internal to HP0527 ( <i>cagY</i> ) |
| 557220      | 557337      | 25           | 117           | Internal to HP0527 ( <i>cagY</i> ) |
| 557220      | 557451      | 40           | 231           | Internal to HP0527 ( <i>cagY</i> ) |
| 557220      | 557772      | 25           | 552           | Internal to HP0527 ( <i>cagY</i> ) |
| 557231      | 557669      | 29           | 438           | Internal to HP0527 ( <i>cagY</i> ) |
| 557252      | 557804      | 36           | 552           | Internal to HP0527 ( <i>cagY</i> ) |

| Chromosome  | Chromosome  | Length of    | Distance      | Sequences                          |
|-------------|-------------|--------------|---------------|------------------------------------|
| location of | location of | repeat       | between       |                                    |
| repeat 1    | repeat 2    | sequence, bp | repeat        | flanked by paired repeats          |
|             |             |              | sequences, bp | in recombination hotspots*         |
| 557271      | 557385      | 91           | 114           | Internal to HP0527 ( <i>cagY</i> ) |
| 557289      | 557841      | 46           | 552           | Internal to HP0527 ( <i>cagY</i> ) |
| 557306      | 557741      | 29           | 435           | Internal to HP0527 ( <i>cagY</i> ) |
| 557336      | 557771      | 41           | 435           | Internal to HP0527 ( <i>cagY</i> ) |
| 557369      | 557690      | 26           | 321           | Internal to HP0527 ( <i>cagY</i> ) |
| 557403      | 557841      | 46           | 438           | Internal to HP0527 ( <i>cagY</i> ) |
| 557420      | 557741      | 29           | 321           | Internal to HP0527 ( <i>cagY</i> ) |
| 557450      | 557771      | 26           | 321           | Internal to HP0527 ( <i>cagY</i> ) |
| 557462      | 557669      | 31           | 207           | Internal to HP0527 ( <i>cagY</i> ) |
| 557516      | 557954      | 40           | 438           | Internal to HP0527 ( <i>cagY</i> ) |
| 557557      | 557995      | 30           | 438           | Internal to HP0527 ( <i>cagY</i> ) |
| 557557      | 558202      | 30           | 645           | Internal to HP0527 ( <i>cagY</i> ) |
| 557557      | 558424      | 30           | 867           | Internal to HP0527 ( <i>cagY</i> ) |
| 557597      | 557828      | 29           | 231           | Internal to HP0527 ( <i>cagY</i> ) |
| 557605      | 557719      | 45           | 114           | Internal to HP0527 ( <i>cagY</i> ) |
| 557741      | 557858      | 50           | 117           | Internal to HP0527 ( <i>cagY</i> ) |
| 557984      | 558191      | 41           | 207           | Internal to HP0527 ( <i>cagY</i> ) |
| 557984      | 558413      | 41           | 429           | Internal to HP0527 ( <i>cagY</i> ) |
| 558184      | 558406      | 51           | 222           | Internal to HP0527 ( <i>cagY</i> ) |
| 559014      | 559404      | 417          | 390           | Internal to HP0527 ( <i>cagY</i> ) |
| 559014      | 559794      | 27           | 780           | Internal to HP0527 ( <i>cagY</i> ) |
| 559042      | 559822      | 119          | 780           | Internal to HP0527 ( <i>cagY</i> ) |
| 559432      | 559822      | 119          | 390           | Internal to HP0527 ( <i>cagY</i> ) |
| 582040      | 582175      | 39           | 135           |                                    |
| 582286      | 582943      | 27           | 657           |                                    |
| 582762      | 582864      | 49           | 102           |                                    |
| 593779      | 1068562     | 31           | 474783        |                                    |
| 593818      | 1068601     | 61           | 474783        |                                    |
| 594088      | 1020503     | 32           | 426415        |                                    |
| 594173      | 1020585     | 59           | 426412        |                                    |
| 647998      | 650512      | 41           | 2514          |                                    |
| 655961      | 986164      | 29           | 330203        |                                    |

| Chromosome    | Chromosome    | Length of    | Distance      | Sequences                               |
|---------------|---------------|--------------|---------------|-----------------------------------------|
| location of   | location of   | repeat       | between       |                                         |
| repeat 1      | repeat 2      | sequence, bp | repeat        | flanked by paired repeats               |
|               |               |              | sequences, bp | in recombination hotspots*              |
| <b>696789</b> | <b>696810</b> | <b>192</b>   | <b>21</b>     | Internal to HP0651 (fucosyltransferase) |
| <b>696789</b> | <b>696831</b> | <b>171</b>   | <b>42</b>     | Internal to HP0651 (fucosyltransferase) |
| <b>696789</b> | <b>696852</b> | <b>150</b>   | <b>63</b>     | Internal to HP0651 (fucosyltransferase) |
| <b>696789</b> | <b>696873</b> | <b>129</b>   | <b>84</b>     | Internal to HP0651 (fucosyltransferase) |
| <b>696789</b> | <b>696894</b> | <b>108</b>   | <b>105</b>    | Internal to HP0651 (fucosyltransferase) |
| <b>696789</b> | <b>696915</b> | <b>87</b>    | <b>126</b>    | Internal to HP0651 (fucosyltransferase) |
| <b>696789</b> | <b>696936</b> | <b>66</b>    | <b>147</b>    | Internal to HP0651 (fucosyltransferase) |
| <b>696789</b> | <b>696957</b> | <b>45</b>    | <b>168</b>    | Internal to HP0651 (fucosyltransferase) |
| <b>696789</b> | <b>696978</b> | <b>24</b>    | <b>189</b>    | Internal to HP0651 (fucosyltransferase) |
| 756758        | 1155929       | 26           | 399171        |                                         |
| 765065        | 1523173       | 25           | 758108        |                                         |
| 765353        | 1523515       | 29           | 758162        |                                         |
| 765458        | 996158        | 25           | 230700        |                                         |
| 765481        | 996180        | 39           | 230699        |                                         |
| 765536        | 996235        | 41           | 230699        |                                         |
| 765580        | 996279        | 49           | 230699        |                                         |
| 765632        | 996331        | 32           | 230699        |                                         |
| 779018        | 1243593       | 26           | 464575        |                                         |
| 779032        | 1317862       | 26           | 538830        |                                         |
| 803822        | 1484895       | 25           | 681073        |                                         |
| 824786        | 824801        | 26           | 15            |                                         |
| 845288        | 899721        | 38           | 54433         |                                         |
| 845343        | 899775        | 56           | 54432         |                                         |
| 845451        | 903639        | 25           | 58188         |                                         |
| 845591        | 899873        | 32           | 54282         |                                         |
| 845625        | 899907        | 43           | 54282         |                                         |
| 845672        | 899954        | 45           | 54282         |                                         |
| <b>845682</b> | <b>846312</b> | <b>49</b>    | <b>630</b>    | Internal to HP0790 ( <i>prrB</i> )      |
| 845682        | 900582        | 50           | 54900         |                                         |
| 846084        | 901058        | 47           | 54974         |                                         |
| 846093        | 900387        | 28           | 54294         |                                         |
| <b>846097</b> | <b>846781</b> | <b>38</b>    | <b>684</b>    | Internal to HP0790 ( <i>prrB</i> )      |

| Chromosome    | Chromosome    | Length of    | Distance      | Sequences                          |
|---------------|---------------|--------------|---------------|------------------------------------|
| location of   | location of   | repeat       | between       |                                    |
| repeat 1      | repeat 2      | sequence, bp | repeat        | flanked by paired repeats          |
|               |               |              | sequences, bp | in recombination hotspots*         |
| 846126        | 900420        | 36           | 54294         |                                    |
| 846198        | 900480        | 38           | 54282         |                                    |
| 846237        | 900519        | 57           | 54282         |                                    |
| <b>846258</b> | <b>846270</b> | <b>36</b>    | <b>12</b>     | Internal to HP0790 ( <i>prrB</i> ) |
| <b>846258</b> | <b>846282</b> | <b>24</b>    | <b>24</b>     | Internal to HP0790 ( <i>prrB</i> ) |
| 846258        | 900552        | 24           | 54294         |                                    |
| 846270        | 900540        | 91           | 54270         |                                    |
| 846282        | 900540        | 24           | 54258         |                                    |
| 846312        | 899964        | 35           | 53652         |                                    |
| 846781        | 900391        | 24           | 53610         |                                    |
| 846781        | 901071        | 34           | 54290         |                                    |
| 846820        | 901110        | 28           | 54290         |                                    |
| 899964        | 900582        | 35           | 618           |                                    |
| 900387        | 901067        | 28           | 680           |                                    |
| 900540        | 900552        | 24           | 12            |                                    |
| 903626        | 1186952       | 25           | 283326        |                                    |
| 903659        | 973628        | 33           | 69969         |                                    |
| 903715        | 973686        | 27           | 69971         |                                    |
| 932710        | 1181085       | 41           | 248375        |                                    |
| 945659        | 946313        | 28           | 654           |                                    |
| 945693        | 946347        | 30           | 654           |                                    |
| 947203        | 1317454       | 31           | 370251        |                                    |
| 947225        | 1317477       | 123          | 370252        |                                    |
| 947349        | 1317601       | 29           | 370252        |                                    |
| 947398        | 1317649       | 81           | 370251        |                                    |
| 947471        | 1317723       | 105          | 370252        |                                    |
| 947617        | 1317875       | 29           | 370258        |                                    |
| 947650        | 1317908       | 40           | 370258        |                                    |
| 947710        | 1317968       | 125          | 370258        |                                    |
| 947848        | 1318106       | 29           | 370258        |                                    |
| 947893        | 1318151       | 59           | 370258        |                                    |
| 947953        | 1318211       | 29           | 370258        |                                    |



| <b>Chromosome</b>  | <b>Chromosome</b>  | <b>Length of</b>    | <b>Distance</b>      | <b>Sequences</b>                  |
|--------------------|--------------------|---------------------|----------------------|-----------------------------------|
| <b>location of</b> | <b>location of</b> | <b>repeat</b>       | <b>between</b>       | <b>flanked by paired repeats</b>  |
| <b>repeat 1</b>    | <b>repeat 2</b>    | <b>sequence, bp</b> | <b>sequences, bp</b> | <b>in recombination hotspots*</b> |
| 947968             | 1243971            | 29                  | 296003               |                                   |
| 948031             | 1318289            | 414                 | 370258               |                                   |
| 949477             | 1319807            | 47                  | 370330               |                                   |
| 949624             | 1319954            | 30                  | 370330               |                                   |
| 950604             | 950739             | 28                  | 135                  |                                   |
| 950648             | 950782             | 33                  | 134                  |                                   |
| 964720             | 1071929            | 32                  | 107209               |                                   |
| 966355             | 967972             | 25                  | 1617                 |                                   |
| 968525             | 968637             | 24                  | 112                  |                                   |
| 968564             | 1050962            | 24                  | 82398                |                                   |
| 973595             | 1612766            | 30                  | 639171               |                                   |
| 980269             | 980326             | 24                  | 57                   |                                   |
| 980891             | 981290             | 203                 | 399                  |                                   |
| 1020796            | 1022794            | 31                  | 1998                 |                                   |
| 1045526            | 1508326            | 28                  | 462800               |                                   |
| 1060174            | 1060227            | 56                  | 53                   |                                   |
| 1060307            | 1612984            | 271                 | 552677               |                                   |
| 1060309            | 1156709            | 1890                | 96400                |                                   |
| 1060579            | 1613256            | 1621                | 552677               |                                   |
| 1062171            | 1524705            | 25                  | 462534               |                                   |
| 1089009            | 1443499            | 24                  | 354490               |                                   |
| 1156709            | 1612986            | 269                 | 456277               |                                   |
| 1156979            | 1613256            | 1620                | 456277               |                                   |
| 1158571            | 1524705            | 25                  | 366134               |                                   |
| 1166553            | 1166613            | 29                  | 60                   |                                   |
| 1182076            | 1182184            | 26                  | 108                  |                                   |
| 1207293            | 1510847            | 552                 | 303554               |                                   |
| 1207863            | 1511416            | 78                  | 303553               |                                   |
| 1207944            | 1511496            | 267                 | 303552               |                                   |
| 1208211            | 1511764            | 61                  | 303553               |                                   |
| 1208274            | 1511828            | 119                 | 303554               |                                   |
| 1208394            | 1511948            | 33                  | 303554               |                                   |

| <b>Chromosome</b>  | <b>Chromosome</b>  | <b>Length of</b>    | <b>Distance</b>      | <b>Sequences</b>                            |
|--------------------|--------------------|---------------------|----------------------|---------------------------------------------|
| <b>location of</b> | <b>location of</b> | <b>repeat</b>       | <b>between</b>       | <b>flanked by paired repeats</b>            |
| <b>repeat 1</b>    | <b>repeat 2</b>    | <b>sequence, bp</b> | <b>sequences, bp</b> | <b>in recombination hotspots*</b>           |
| 1208428            | 1511982            | 470                 | 303554               |                                             |
| 1208897            | 1512450            | 713                 | 303553               |                                             |
| <b>1256735</b>     | <b>1258157</b>     | <b>72</b>           | <b>1422</b>          | HP1187                                      |
| <b>1256812</b>     | <b>1258234</b>     | <b>74</b>           | <b>1422</b>          | HP1187 and 3' region of HP1188              |
| <b>1256910</b>     | <b>1258321</b>     | <b>36</b>           | <b>1411</b>          | 5' region of HP1187 and 3' region of HP1188 |
| <b>1256947</b>     | <b>1258358</b>     | <b>27</b>           | <b>1411</b>          | 5' region of HP1187 and 3' region of HP1188 |
| <b>1256975</b>     | <b>1258386</b>     | <b>34</b>           | <b>1411</b>          | 5' region of HP1187 and 3' region of HP1188 |
| <b>1257031</b>     | <b>1258442</b>     | <b>44</b>           | <b>1411</b>          | 5' region of HP1187 and 3' region of HP1188 |
| <b>1257076</b>     | <b>1258487</b>     | <b>52</b>           | <b>1411</b>          | 5' region of HP1187 and 3' region of HP1188 |
| <b>1257146</b>     | <b>1258557</b>     | <b>78</b>           | <b>1411</b>          | 5' region of HP1187 and 3' region of HP1188 |
| <b>1257268</b>     | <b>1258679</b>     | <b>25</b>           | <b>1411</b>          | 5' region of HP1187 and 3' region of HP1188 |
| <b>1257350</b>     | <b>1257371</b>     | <b>27</b>           | <b>21</b>            | Internal region of HP1187                   |
| <b>1257400</b>     | <b>1257454</b>     | <b>24</b>           | <b>54</b>            | Internal region of HP1187                   |
| <b>1257548</b>     | <b>1258851</b>     | <b>95</b>           | <b>1303</b>          | 5' region of HP1187 and 3' region of HP1188 |
| <b>1257872</b>     | <b>1259174</b>     | <b>55</b>           | <b>1302</b>          | 5' region of HP1187, and HP1188             |
| <b>1257944</b>     | <b>1259246</b>     | <b>78</b>           | <b>1302</b>          | HP1188                                      |
| <b>1258023</b>     | <b>1259325</b>     | <b>53</b>           | <b>1302</b>          | HP1188                                      |
| 1263291            | 1263348            | 126                 | 57                   |                                             |
| 1263291            | 1263405            | 69                  | 114                  |                                             |
| 1267198            | 1281690            | 26                  | 14492                |                                             |
| <b>1382521</b>     | <b>1382529</b>     | <b>59</b>           | <b>8</b>             | Noncoding region upstream of HP1322         |
| <b>1382521</b>     | <b>1382537</b>     | <b>51</b>           | <b>16</b>            | Noncoding region upstream of HP1322         |
| <b>1382521</b>     | <b>1382545</b>     | <b>43</b>           | <b>24</b>            | Noncoding region upstream of HP1322         |
| <b>1382521</b>     | <b>1382553</b>     | <b>35</b>           | <b>32</b>            | Noncoding region upstream of HP1322         |
| <b>1382521</b>     | <b>1382561</b>     | <b>27</b>           | <b>40</b>            | Noncoding region upstream of HP1322         |
| 1411265            | 1413469            | 39                  | 2204                 |                                             |
| 1411306            | 1413510            | 50                  | 2204                 |                                             |
| 1427542            | 1430724            | 41                  | 3182                 |                                             |
| 1427584            | 1430766            | 38                  | 3182                 |                                             |
| 1444160            | 1444175            | 26                  | 15                   |                                             |
| <b>1477285</b>     | <b>1477301</b>     | <b>78</b>           | <b>16</b>            | Noncoding region upstream of HP1408         |
| <b>1477285</b>     | <b>1477317</b>     | <b>62</b>           | <b>32</b>            | Noncoding region upstream of HP1408         |

| <b>Chromosome</b>  | <b>Chromosome</b>  | <b>Length of</b>    | <b>Distance</b>      | <b>Sequences</b>                            |
|--------------------|--------------------|---------------------|----------------------|---------------------------------------------|
| <b>location of</b> | <b>location of</b> | <b>repeat</b>       | <b>between</b>       |                                             |
| <b>repeat 1</b>    | <b>repeat 2</b>    | <b>sequence, bp</b> | <b>repeat</b>        | <b>flanked by paired repeats</b>            |
|                    |                    |                     | <b>sequences, bp</b> | <b>in recombination hotspots*</b>           |
| 1477285            | 1477333            | 46                  | 48                   | Noncoding region upstream of HP1408         |
| 1477285            | 1477349            | 30                  | 64                   | Noncoding region upstream of HP1408         |
| 1477577            | 1477585            | 27                  | 8                    | Internal to HP1408                          |
| 1477652            | 1477660            | 80                  | 8                    | Internal to HP1408                          |
| 1477652            | 1477668            | 72                  | 16                   | Internal to HP1408                          |
| 1477652            | 1477676            | 64                  | 24                   | Internal to HP1408                          |
| 1477652            | 1477684            | 56                  | 32                   | Internal to HP1408                          |
| 1477652            | 1477692            | 48                  | 40                   | Internal to HP1408                          |
| 1477652            | 1477700            | 40                  | 48                   | Internal to HP1408                          |
| 1477652            | 1477708            | 32                  | 56                   | Internal to HP1408                          |
| 1477652            | 1477716            | 24                  | 64                   | Internal to HP1408                          |
| 1503051            | 1612488            | 45                  | 109437               |                                             |
| 1503166            | 1612602            | 24                  | 109436               |                                             |
| 1503195            | 1612630            | 34                  | 109435               |                                             |
| 1503279            | 1612712            | 39                  | 109433               |                                             |
| 1508339            | 1508345            | 33                  | 6                    |                                             |
| 1508339            | 1508351            | 27                  | 12                   |                                             |
| 1524705            | 1614848            | 25                  | 90143                |                                             |
| 1544145            | 1544169            | 33                  | 24                   |                                             |
| 1594849            | 1597149            | 27                  | 2300                 |                                             |
| 1630356            | 1630916            | 27                  | 560                  |                                             |
| 1642764            | 1643972            | 28                  | 1208                 | HP1561                                      |
| 1642793            | 1644001            | 50                  | 1208                 | HP1561, and 3' region of HP1562             |
| 1642844            | 1644052            | 290                 | 1208                 | HP1561, and 3' region of HP1562             |
| 1643227            | 1644435            | 45                  | 1208                 | 5' region of HP1561 and 3' region of HP1562 |
| 1643367            | 1644575            | 64                  | 1208                 | 5' region of HP1561 and 3' region of HP1562 |
| 1643626            | 1644828            | 26                  | 1202                 | 5' region of HP1561 and 3' region of HP1562 |
| 1643753            | 1644955            | 30                  | 1202                 | 5' region of HP1561 and HP1562              |
| 1665166            | 1667514            | 66                  | 2348                 |                                             |
| 1666104            | 1667114            | 80                  | 1010                 |                                             |

Bold font indicates paired repeats fall within a recombination hotspot, defined a region  $\leq 5,000$  bp containing  $\geq 4$  paired identical repeat sequences

\*Gene designations were obtained from the TIGR database ([www.tigr.org](http://www.tigr.org))
