# Supplementary material
Source: PubMed Central journal article supplement (PMC263856)
Supplement: pnas_100_23_13579__6.pdf [file pnas_100_23_13579__6.pdf]

**Table 5. Characteristics of paired repeat sequences in *Helicobacter pylori* strain J99**

| <b>Chromosome</b>  | <b>Chromosome</b>  | <b>Length of</b>    | <b>Distance</b>       | <b>Sequences</b>                  |
|--------------------|--------------------|---------------------|-----------------------|-----------------------------------|
| <b>location of</b> | <b>location of</b> | <b>Repeat</b>       | <b>between repeat</b> | <b>flanked by paired repeats</b>  |
| <b>repeat 1</b>    | <b>repeat 2</b>    | <b>sequence, bp</b> | <b>sequences, bp</b>  | <b>in recombination hotspots*</b> |
| 5152               | 5167               | 113                 | 15                    | JHP0006/JHP0007 intergenic region |
| 5152               | 5182               | 98                  | 30                    | JHP0006/JHP0007 intergenic region |
| 5152               | 5197               | 83                  | 45                    | JHP0006/JHP0007 intergenic region |
| 5152               | 5212               | 68                  | 60                    | JHP0006/JHP0007 intergenic region |
| 5152               | 5227               | 53                  | 75                    | JHP0006/JHP0007 intergenic region |
| 5152               | 5242               | 38                  | 90                    | JHP0006/JHP0007 intergenic region |
| 5387               | 23501              | 29                  | 18114                 |                                   |
| 5403               | 912753             | 25                  | 736481                |                                   |
| 5492               | 23594              | 45                  | 18102                 |                                   |
| 5593               | 231956             | 27                  | 226363                |                                   |
| 5848               | 232223             | 25                  | 226375                |                                   |
| 5871               | 1224971            | 38                  | 424731                |                                   |
| 6162               | 913528             | 24                  | 736465                |                                   |
| 6162               | 1297653            | 24                  | 352340                |                                   |
| 7316               | 236870             | 24                  | 229554                |                                   |
| 7322               | 1298906            | 33                  | 352247                |                                   |
| 7401               | 743333             | 24                  | 735932                |                                   |
| 7412               | 1298995            | 31                  | 352248                |                                   |
| 23039              | 1455388            | 34                  | 211482                |                                   |
| 23039              | 1455705            | 30                  | 211165                |                                   |
| 23094              | 1455442            | 109                 | 211483                |                                   |
| 23121              | 1562753            | 82                  | 104199                |                                   |
| 23556              | 741446             | 31                  | 717890                |                                   |
| 23721              | 912973             | 24                  | 754579                |                                   |
| 23721              | 1297098            | 24                  | 370454                |                                   |
| 23798              | 913050             | 27                  | 754579                |                                   |
| 23798              | 1297175            | 27                  | 370454                |                                   |
| 24012              | 235983             | 26                  | 211971                |                                   |
| 25284              | 914698             | 32                  | 754417                |                                   |
| 25469              | 1298894            | 35                  | 370406                |                                   |
| 25524              | 743297             | 30                  | 717773                |                                   |

| <b>Chromosome</b>  | <b>Chromosome</b>  | <b>Length of</b>    | <b>Distance</b>       | <b>Sequences</b>                  |
|--------------------|--------------------|---------------------|-----------------------|-----------------------------------|
| <b>location of</b> | <b>location of</b> | <b>Repeat</b>       | <b>between repeat</b> | <b>flanked by paired repeats</b>  |
| <b>repeat 1</b>    | <b>repeat 2</b>    | <b>sequence, bp</b> | <b>sequences, bp</b>  | <b>in recombination hotspots*</b> |
| 25867              | 25973              | 26                  | 106                   |                                   |
| 31447              | 1012854            | 34                  | 662424                |                                   |
| 33610              | 270296             | 26                  | 236686                |                                   |
| 50637              | 53118              | 48                  | 2481                  |                                   |
| <b>59505</b>       | <b>59946</b>       | <b>28</b>           | <b>441</b>            | Internal to JHP0050               |
| <b>59505</b>       | <b>59974</b>       | <b>32</b>           | <b>469</b>            | Internal to JHP0050               |
| <b>59511</b>       | <b>59721</b>       | <b>31</b>           | <b>210</b>            | Internal to JHP0050               |
| <b>59513</b>       | <b>59639</b>       | <b>24</b>           | <b>126</b>            | Internal to JHP0050               |
| <b>59543</b>       | <b>59753</b>       | <b>61</b>           | <b>210</b>            | Internal to JHP0050               |
| <b>59639</b>       | <b>59723</b>       | <b>24</b>           | <b>84</b>             | Internal to JHP0050               |
| <b>59639</b>       | <b>59982</b>       | <b>25</b>           | <b>343</b>            | Internal to JHP0050               |
| <b>59721</b>       | <b>59980</b>       | <b>26</b>           | <b>259</b>            | Internal to JHP0050               |
| <b>59946</b>       | <b>59974</b>       | <b>28</b>           | <b>28</b>             | Internal to JHP0050               |
| 61471              | 1150540            | 24                  | 554762                |                                   |
| 83061              | 105572             | 29                  | 22511                 |                                   |
| 123914             | 1237714            | 37                  | 530031                |                                   |
| 124059             | 1237871            | 69                  | 530019                |                                   |
| 124146             | 1237958            | 29                  | 530019                |                                   |
| 124177             | 1237989            | 34                  | 530019                |                                   |
| 124212             | 1238024            | 71                  | 530019                |                                   |
| 124296             | 1238108            | 46                  | 530019                |                                   |
| 124344             | 1238156            | 35                  | 530019                |                                   |
| 124530             | 124656             | 28                  | 126                   |                                   |
| 124560             | 1238372            | 27                  | 530019                |                                   |
| 124560             | 1238393            | 27                  | 529998                |                                   |
| 124560             | 1238414            | 27                  | 529977                |                                   |
| 124560             | 1238435            | 27                  | 529956                |                                   |
| 124560             | 1238456            | 26                  | 529935                |                                   |
| 125164             | 1238874            | 28                  | 530121                |                                   |
| 132447             | 1153101            | 25                  | 623177                |                                   |
| 132457             | 167997             | 25                  | 35540                 |                                   |
| 134744             | 241344             | 52                  | 106600                |                                   |
| 143764             | 145465             | 26                  | 1701                  |                                   |

| <b>Chromosome</b>  | <b>Chromosome</b>  | <b>Length of</b>    | <b>Distance</b>       | <b>Sequences</b>                  |
|--------------------|--------------------|---------------------|-----------------------|-----------------------------------|
| <b>location of</b> | <b>location of</b> | <b>Repeat</b>       | <b>between repeat</b> | <b>flanked by paired repeats</b>  |
| <b>repeat 1</b>    | <b>repeat 2</b>    | <b>sequence, bp</b> | <b>sequences, bp</b>  | <b>in recombination hotspots*</b> |
| 143994             | 145695             | 25                  | 1701                  |                                   |
| 144631             | 146338             | 35                  | 1707                  |                                   |
| 163525             | 230603             | 24                  | 67078                 |                                   |
| 168001             | 1106593            | 24                  | 705239                |                                   |
| 168037             | 718938             | 28                  | 550901                |                                   |
| 168040             | 995085             | 28                  | 816786                |                                   |
| 182385             | 1488418            | 26                  | 337798                |                                   |
| 231802             | 741431             | 32                  | 509629                |                                   |
| 231805             | 1224530            | 32                  | 651106                |                                   |
| 231892             | 1224617            | 29                  | 651106                |                                   |
| 232096             | 913087             | 26                  | 680991                |                                   |
| 232096             | 1297212            | 26                  | 578715                |                                   |
| 232246             | 741866             | 32                  | 509620                |                                   |
| 233776             | 1226342            | 26                  | 651265                |                                   |
| 236980             | 1226442            | 41                  | 654369                |                                   |
| 236985             | 743373             | 33                  | 506388                |                                   |
| 256312             | 257125             | 27                  | 813                   |                                   |
| 285859             | 1622985            | 24                  | 306705                |                                   |
| 285883             | 994989             | 26                  | 709106                |                                   |
| 285937             | 995042             | 26                  | 709105                |                                   |
| 285945             | 309419             | 25                  | 23474                 |                                   |
| 285945             | 1153122            | 28                  | 776654                |                                   |
| 309410             | 1153113            | 34                  | 800128                |                                   |
| 328096             | 617585             | 28                  | 289489                |                                   |
| 328125             | 617614             | 90                  | 289489                |                                   |
| 328268             | 617758             | 35                  | 289490                |                                   |
| 328313             | 617797             | 28                  | 289484                |                                   |
| 328775             | 617879             | 37                  | 289104                |                                   |
| 329045             | 618031             | 26                  | 288986                |                                   |
| 329528             | 618242             | 24                  | 288714                |                                   |
| 329606             | 618321             | 25                  | 288715                |                                   |
| 344932             | 345040             | 24                  | 108                   |                                   |
| 345054             | 345162             | 53                  | 108                   |                                   |

| Chromosome    | Chromosome    | Length of    | Distance       | Sequences                           |
|---------------|---------------|--------------|----------------|-------------------------------------|
| location of   | location of   | Repeat       | between repeat | flanked by paired repeats           |
| repeat 1      | repeat 2      | sequence, bp | sequences, bp  | in recombination hotspots*          |
| 345352        | 345460        | 35           | 108            |                                     |
| 373659        | 1213931       | 26           | 803559         |                                     |
| 409966        | 931123        | 43           | 521157         |                                     |
| 409979        | 930829        | 30           | 520850         |                                     |
| 448203        | 448212        | 49           | 9              |                                     |
| 448203        | 448221        | 40           | 18             |                                     |
| 448203        | 448230        | 31           | 27             |                                     |
| 461948        | 952938        | 25           | 490990         |                                     |
| 462019        | 952994        | 301          | 490975         |                                     |
| 462347        | 953322        | 726          | 490975         |                                     |
| 469523        | 470981        | 26           | 1458           |                                     |
| 497375        | 497681        | 28           | 306            |                                     |
| 504489        | 504498        | 26           | 9              |                                     |
| 510166        | 547926        | 37           | 37760          |                                     |
| <b>519730</b> | <b>520399</b> | <b>62</b>    | <b>669</b>     | Internal to JHP0476 ( <i>cagY</i> ) |
| <b>519739</b> | <b>520291</b> | <b>50</b>    | <b>552</b>     | Internal to JHP0476 ( <i>cagY</i> ) |
| <b>519739</b> | <b>520729</b> | <b>53</b>    | <b>990</b>     | Internal to JHP0476 ( <i>cagY</i> ) |
| <b>519739</b> | <b>520957</b> | <b>53</b>    | <b>1218</b>    | Internal to JHP0476 ( <i>cagY</i> ) |
| <b>519739</b> | <b>521185</b> | <b>48</b>    | <b>1446</b>    | Internal to JHP0476 ( <i>cagY</i> ) |
| <b>519739</b> | <b>521944</b> | <b>53</b>    | <b>2205</b>    | Internal to JHP0476 ( <i>cagY</i> ) |
| <b>519747</b> | <b>519864</b> | <b>45</b>    | <b>117</b>     | Internal to JHP0476 ( <i>cagY</i> ) |
| <b>519762</b> | <b>520107</b> | <b>30</b>    | <b>345</b>     | Internal to JHP0476 ( <i>cagY</i> ) |
| <b>519793</b> | <b>520138</b> | <b>25</b>    | <b>345</b>     | Internal to JHP0476 ( <i>cagY</i> ) |
| <b>519793</b> | <b>520345</b> | <b>53</b>    | <b>552</b>     | Internal to JHP0476 ( <i>cagY</i> ) |
| <b>519864</b> | <b>520299</b> | <b>42</b>    | <b>435</b>     | Internal to JHP0476 ( <i>cagY</i> ) |
| <b>519864</b> | <b>520416</b> | <b>105</b>   | <b>552</b>     | Internal to JHP0476 ( <i>cagY</i> ) |
| <b>519864</b> | <b>520737</b> | <b>105</b>   | <b>873</b>     | Internal to JHP0476 ( <i>cagY</i> ) |
| <b>519864</b> | <b>520965</b> | <b>105</b>   | <b>1101</b>    | Internal to JHP0476 ( <i>cagY</i> ) |
| <b>519864</b> | <b>521193</b> | <b>40</b>    | <b>1329</b>    | Internal to JHP0476 ( <i>cagY</i> ) |
| <b>519864</b> | <b>521952</b> | <b>66</b>    | <b>2088</b>    | Internal to JHP0476 ( <i>cagY</i> ) |
| <b>519879</b> | <b>520107</b> | <b>37</b>    | <b>228</b>     | Internal to JHP0476 ( <i>cagY</i> ) |
| <b>519937</b> | <b>521266</b> | <b>32</b>    | <b>1329</b>    | Internal to JHP0476 ( <i>cagY</i> ) |
| <b>519959</b> | <b>521609</b> | <b>46</b>    | <b>1650</b>    | Internal to JHP0476 ( <i>cagY</i> ) |

| Chromosome  | Chromosome  | Length of    | Distance       | Sequences                           |
|-------------|-------------|--------------|----------------|-------------------------------------|
| location of | location of | Repeat       | between repeat | flanked by paired repeats           |
| repeat 1    | repeat 2    | sequence, bp | sequences, bp  | in recombination hotspots*          |
| 519970      | 520522      | 24           | 552            | Internal to JHP0476 ( <i>cagY</i> ) |
| 519970      | 520843      | 24           | 873            | Internal to JHP0476 ( <i>cagY</i> ) |
| 519970      | 521071      | 24           | 1101           | Internal to JHP0476 ( <i>cagY</i> ) |
| 519970      | 521299      | 24           | 1329           | Internal to JHP0476 ( <i>cagY</i> ) |
| 519976      | 521743      | 29           | 1767           | Internal to JHP0476 ( <i>cagY</i> ) |
| 519995      | 520547      | 41           | 552            | Internal to JHP0476 ( <i>cagY</i> ) |
| 519995      | 520868      | 76           | 873            | Internal to JHP0476 ( <i>cagY</i> ) |
| 519995      | 521096      | 76           | 1101           | Internal to JHP0476 ( <i>cagY</i> ) |
| 519995      | 521324      | 41           | 1329           | Internal to JHP0476 ( <i>cagY</i> ) |
| 519995      | 521531      | 43           | 1536           | Internal to JHP0476 ( <i>cagY</i> ) |
| 520018      | 521668      | 29           | 1650           | Internal to JHP0476 ( <i>cagY</i> ) |
| 520107      | 520314      | 27           | 207            | Internal to JHP0476 ( <i>cagY</i> ) |
| 520107      | 520431      | 37           | 324            | Internal to JHP0476 ( <i>cagY</i> ) |
| 520107      | 520752      | 37           | 645            | Internal to JHP0476 ( <i>cagY</i> ) |
| 520107      | 520980      | 37           | 873            | Internal to JHP0476 ( <i>cagY</i> ) |
| 520107      | 521208      | 25           | 1101           | Internal to JHP0476 ( <i>cagY</i> ) |
| 520107      | 521967      | 37           | 1860           | Internal to JHP0476 ( <i>cagY</i> ) |
| 520135      | 520342      | 28           | 207            | Internal to JHP0476 ( <i>cagY</i> ) |
| 520186      | 520624      | 86           | 438            | Internal to JHP0476 ( <i>cagY</i> ) |
| 520228      | 521443      | 44           | 1215           | Internal to JHP0476 ( <i>cagY</i> ) |
| 520228      | 521881      | 44           | 1653           | Internal to JHP0476 ( <i>cagY</i> ) |
| 520228      | 522088      | 35           | 1860           | Internal to JHP0476 ( <i>cagY</i> ) |
| 520228      | 522310      | 29           | 2082           | Internal to JHP0476 ( <i>cagY</i> ) |
| 520273      | 520939      | 68           | 666            | Internal to JHP0476 ( <i>cagY</i> ) |
| 520273      | 521167      | 66           | 894            | Internal to JHP0476 ( <i>cagY</i> ) |
| 520280      | 520718      | 61           | 438            | Internal to JHP0476 ( <i>cagY</i> ) |
| 520280      | 521495      | 33           | 1215           | Internal to JHP0476 ( <i>cagY</i> ) |
| 520280      | 521726      | 33           | 1446           | Internal to JHP0476 ( <i>cagY</i> ) |
| 520280      | 521933      | 61           | 1653           | Internal to JHP0476 ( <i>cagY</i> ) |
| 520291      | 520408      | 50           | 117            | Internal to JHP0476 ( <i>cagY</i> ) |
| 520408      | 520729      | 180          | 321            | Internal to JHP0476 ( <i>cagY</i> ) |
| 520408      | 520957      | 180          | 549            | Internal to JHP0476 ( <i>cagY</i> ) |
| 520408      | 521185      | 48           | 777            | Internal to JHP0476 ( <i>cagY</i> ) |

| Chromosome  | Chromosome  | Length of    | Distance       | Sequences                           |
|-------------|-------------|--------------|----------------|-------------------------------------|
| location of | location of | Repeat       | between repeat | flanked by paired repeats           |
| repeat 1    | repeat 2    | sequence, bp | sequences, bp  | in recombination hotspots*          |
| 520408      | 521944      | 74           | 1536           | Internal to JHP0476 ( <i>cagY</i> ) |
| 520489      | 521266      | 155          | 777            | Internal to JHP0476 ( <i>cagY</i> ) |
| 520522      | 521620      | 24           | 1098           | Internal to JHP0476 ( <i>cagY</i> ) |
| 520528      | 521512      | 60           | 984            | Internal to JHP0476 ( <i>cagY</i> ) |
| 520666      | 521443      | 85           | 777            | Internal to JHP0476 ( <i>cagY</i> ) |
| 520666      | 521881      | 137          | 1215           | Internal to JHP0476 ( <i>cagY</i> ) |
| 520666      | 522088      | 35           | 1422           | Internal to JHP0476 ( <i>cagY</i> ) |
| 520666      | 522310      | 29           | 1644           | Internal to JHP0476 ( <i>cagY</i> ) |
| 520711      | 521719      | 40           | 1008           | Internal to JHP0476 ( <i>cagY</i> ) |
| 520718      | 520946      | 287          | 228            | Internal to JHP0476 ( <i>cagY</i> ) |
| 520718      | 521174      | 59           | 456            | Internal to JHP0476 ( <i>cagY</i> ) |
| 520810      | 521266      | 99           | 456            | Internal to JHP0476 ( <i>cagY</i> ) |
| 520843      | 521620      | 24           | 777            | Internal to JHP0476 ( <i>cagY</i> ) |
| 520849      | 521512      | 62           | 663            | Internal to JHP0476 ( <i>cagY</i> ) |
| 520891      | 521668      | 29           | 777            | Internal to JHP0476 ( <i>cagY</i> ) |
| 520946      | 521495      | 33           | 549            | Internal to JHP0476 ( <i>cagY</i> ) |
| 520946      | 521726      | 33           | 780            | Internal to JHP0476 ( <i>cagY</i> ) |
| 520946      | 521933      | 85           | 987            | Internal to JHP0476 ( <i>cagY</i> ) |
| 521038      | 521266      | 99           | 228            | Internal to JHP0476 ( <i>cagY</i> ) |
| 521071      | 521620      | 24           | 549            | Internal to JHP0476 ( <i>cagY</i> ) |
| 521077      | 521512      | 62           | 435            | Internal to JHP0476 ( <i>cagY</i> ) |
| 521119      | 521668      | 29           | 549            | Internal to JHP0476 ( <i>cagY</i> ) |
| 521174      | 521495      | 33           | 321            | Internal to JHP0476 ( <i>cagY</i> ) |
| 521174      | 521726      | 33           | 552            | Internal to JHP0476 ( <i>cagY</i> ) |
| 521174      | 521933      | 59           | 759            | Internal to JHP0476 ( <i>cagY</i> ) |
| 521236      | 521995      | 27           | 759            | Internal to JHP0476 ( <i>cagY</i> ) |
| 521299      | 521620      | 24           | 321            | Internal to JHP0476 ( <i>cagY</i> ) |
| 521305      | 521512      | 60           | 207            | Internal to JHP0476 ( <i>cagY</i> ) |
| 521418      | 521856      | 110          | 438            | Internal to JHP0476 ( <i>cagY</i> ) |
| 521422      | 522067      | 56           | 645            | Internal to JHP0476 ( <i>cagY</i> ) |
| 521424      | 522291      | 48           | 867            | Internal to JHP0476 ( <i>cagY</i> ) |
| 521488      | 521719      | 42           | 231            | Internal to JHP0476 ( <i>cagY</i> ) |
| 521626      | 521743      | 38           | 117            | Internal to JHP0476 ( <i>cagY</i> ) |

| Chromosome  | Chromosome  | Length of    | Distance       | Sequences                                     |
|-------------|-------------|--------------|----------------|-----------------------------------------------|
| location of | location of | Repeat       | between repeat | flanked by paired repeats                     |
| repeat 1    | repeat 2    | sequence, bp | sequences, bp  | in recombination hotspots*                    |
| 521719      | 521926      | 40           | 207            | Internal to JHP0476 ( <i>cagY</i> )           |
| 521860      | 522067      | 56           | 207            | Internal to JHP0476 ( <i>cagY</i> )           |
| 521862      | 522291      | 48           | 429            | Internal to JHP0476 ( <i>cagY</i> )           |
| 522069      | 522291      | 48           | 222            | Internal to JHP0476 ( <i>cagY</i> )           |
| 522908      | 523346      | 32           | 438            | Internal to JHP0476 ( <i>cagY</i> )           |
| 522940      | 523363      | 52           | 423            | Internal to JHP0476 ( <i>cagY</i> )           |
| 522950      | 522983      | 25           | 33             | Internal to JHP0476 ( <i>cagY</i> )           |
| 522983      | 523373      | 25           | 390            | Internal to JHP0476 ( <i>cagY</i> )           |
| 523015      | 523405      | 88           | 390            | Internal to JHP0476 ( <i>cagY</i> )           |
| 545720      | 545855      | 39           | 135            |                                               |
| 546393      | 546495      | 49           | 102            |                                               |
| 547193      | 908970      | 28           | 361777         |                                               |
| 547222      | 908999      | 41           | 361777         |                                               |
| 616674      | 952032      | 30           | 335358         |                                               |
| 624234      | 625290      | 51           | 1056           | JHP0562 and 5' region of JHP0563              |
| 624286      | 625342      | 46           | 1056           | 3' region of JHP0562 and 5' region of JHP0563 |
| 624333      | 625389      | 57           | 1056           | 3' region of JHP0562 and 5' region of JHP0563 |
| 624513      | 625572      | 38           | 1059           | 3' region of JHP0562 and 5' region of JHP0563 |
| 624552      | 625611      | 29           | 1059           | 3' region of JHP0562 and 5' region of JHP0563 |
| 624582      | 625641      | 26           | 1059           | 3' region of JHP0562 and 5' region of JHP0563 |
| 624906      | 626266      | 30           | 1360           | 3' region of JHP0562 and 5' region of JHP0563 |
| 624937      | 626297      | 35           | 1360           | 3' region of JHP0562 and 5' region of JHP0563 |
| 625187      | 626541      | 39           | 1354           | 3' region of JHP0562 and 5' region of JHP0563 |
| 625983      | 626037      | 71           | 54             | internal region of JHP0563                    |
| 659175      | 1111952     | 24           | 452777         |                                               |
| 659200      | 1111977     | 187          | 452777         |                                               |
| 659299      | 659320      | 130          | 21             | Internal to JHP0596 ( <i>fucT</i> )           |
| 659299      | 659341      | 109          | 42             | Internal to JHP0596 ( <i>fucT</i> )           |
| 659299      | 659362      | 88           | 63             | Internal to JHP0596 ( <i>fucT</i> )           |
| 659299      | 659383      | 67           | 84             | Internal to JHP0596 ( <i>fucT</i> )           |
| 659299      | 659404      | 46           | 105            | Internal to JHP0596 ( <i>fucT</i> )           |
| 659299      | 659425      | 25           | 126            | Internal to JHP0596 ( <i>fucT</i> )           |
| 659299      | 1112097     | 67           | 452798         |                                               |

| Chromosome    | Chromosome    | Length of    | Distance       | Sequences                           |
|---------------|---------------|--------------|----------------|-------------------------------------|
| location of   | location of   | Repeat       | between repeat | flanked by paired repeats           |
| repeat 1      | repeat 2      | sequence, bp | sequences, bp  | in recombination hotspots*          |
| 659299        | 1112118       | 46           | 452819         |                                     |
| 659299        | 1112139       | 25           | 452840         |                                     |
| 659320        | 1112076       | 88           | 452756         |                                     |
| 659341        | 1112076       | 88           | 452735         |                                     |
| 659362        | 1112076       | 471          | 452714         |                                     |
| 659383        | 1112076       | 67           | 452693         |                                     |
| 659404        | 1112076       | 46           | 452672         |                                     |
| 659425        | 1112076       | 25           | 452651         |                                     |
| 659834        | 1112548       | 143          | 452714         |                                     |
| 659978        | 1112692       | 167          | 452714         |                                     |
| 660146        | 1112860       | 86           | 452714         |                                     |
| 660233        | 1112947       | 94           | 452714         |                                     |
| 660328        | 1113042       | 71           | 452714         |                                     |
| 718941        | 995085        | 25           | 276144         |                                     |
| 726248        | 962501        | 26           | 236253         |                                     |
| 726293        | 962547        | 490          | 236254         |                                     |
| 726485        | 1473876       | 31           | 747391         |                                     |
| 726811        | 963065        | 26           | 236254         |                                     |
| 726862        | 963131        | 33           | 236269         |                                     |
| 726896        | 963165        | 28           | 236269         |                                     |
| 726926        | 963195        | 34           | 236269         |                                     |
| 727036        | 963338        | 26           | 236302         |                                     |
| 727063        | 963365        | 26           | 236302         |                                     |
| 727090        | 963392        | 47           | 236302         |                                     |
| 727392        | 963679        | 28           | 236287         |                                     |
| 727447        | 963734        | 960          | 236287         |                                     |
| 732365        | 1274539       | 35           | 542174         |                                     |
| 738289        | 1379343       | 32           | 641054         |                                     |
| 738724        | 1379787       | 32           | 641063         |                                     |
| 741434        | 1224530       | 29           | 483096         |                                     |
| 743373        | 1226447       | 33           | 483074         |                                     |
| 766085        | 836678        | 26           | 70593          |                                     |
| <b>787254</b> | <b>787269</b> | <b>116</b>   | <b>15</b>      | Internal to JHP0709 ( <i>amiA</i> ) |



| Chromosome  | Chromosome  | Length of    | Distance       | Sequences                                                     |
|-------------|-------------|--------------|----------------|---------------------------------------------------------------|
| location of | location of | Repeat       | between repeat | flanked by paired repeats                                     |
| repeat 1    | repeat 2    | sequence, bp | sequences, bp  | in recombination hotspots*                                    |
| 787254      | 787284      | 101          | 30             | Internal to JHP0709 ( <i>amiA</i> )                           |
| 787254      | 787299      | 86           | 45             | Internal to JHP0709 ( <i>amiA</i> )                           |
| 787254      | 787314      | 71           | 60             | Internal to JHP0709 ( <i>amiA</i> )                           |
| 787254      | 787329      | 56           | 75             | Internal to JHP0709 ( <i>amiA</i> )                           |
| 787254      | 787344      | 41           | 90             | Internal to JHP0709 ( <i>amiA</i> )                           |
| 787254      | 787359      | 26           | 105            | Internal to JHP0709 ( <i>amiA</i> )                           |
| 797396      | 797415      | 34           | 19             |                                                               |
| 807984      | 864872      | 30           | 56888          |                                                               |
| 808054      | 864942      | 77           | 56888          |                                                               |
| 808524      | 809226      | 36           | 702            |                                                               |
| 808710      | 808722      | 37           | 12             |                                                               |
| 808710      | 808734      | 25           | 24             |                                                               |
| 808953      | 1563215     | 24           | 754262         |                                                               |
| 808953      | 1563827     | 24           | 754874         |                                                               |
| 809302      | 865446      | 26           | 56144          |                                                               |
| 832674      | 834716      | 264          | 2042           | 3' region of JHP0753, JHP754-JHP756, and 5' region of JHP0757 |
| 832939      | 834981      | 83           | 2042           | 3' region of JHP0753, JHP754-JHP756, and 5' region of JHP0757 |
| 833032      | 835074      | 26           | 2042           | 3' region of JHP0753, JHP754-JHP756, and 5' region of JHP0757 |
| 833059      | 835101      | 53           | 2042           | 3' region of JHP0753, JHP754-JHP756, and 5' region of JHP0757 |
| 833113      | 835155      | 96           | 2042           | 3' region of JHP0753, JHP754-JHP756, and 5' region of JHP0757 |
| 863137      | 863155      | 26           | 18             |                                                               |
| 864678      | 864705      | 27           | 27             |                                                               |
| 892652      | 977639      | 26           | 84987          |                                                               |
| 893349      | 1157389     | 45           | 264040         |                                                               |
| 893935      | 1157976     | 269          | 264041         |                                                               |
| 893935      | 1159944     | 36           | 266009         |                                                               |
| 894205      | 1158246     | 26           | 264041         |                                                               |
| 911616      | 912237      | 33           | 621            |                                                               |

| Chromosome     | Chromosome     | Length of    | Distance       | Sequences                                     |
|----------------|----------------|--------------|----------------|-----------------------------------------------|
| location of    | location of    | Repeat       | between repeat | flanked by paired repeats                     |
| repeat 1       | repeat 2       | sequence, bp | sequences, bp  | in recombination hotspots*                    |
| 912608         | 1296594        | 24           | 383986         |                                               |
| 912608         | 1296610        | 24           | 384002         |                                               |
| 912638         | 1296641        | 24           | 384003         |                                               |
| 912643         | 1296660        | 31           | 384017         |                                               |
| 912733         | 1296857        | 28           | 384124         |                                               |
| 912793         | 1296918        | 890          | 384125         |                                               |
| 912921         | 1224655        | 27           | 311734         |                                               |
| 914905         | 1298916        | 24           | 384011         |                                               |
| <b>916126</b>  | <b>916261</b>  | <b>31</b>    | <b>135</b>     | Internal to JHP0834                           |
| <b>916126</b>  | <b>916396</b>  | <b>31</b>    | <b>270</b>     | Internal to JHP0834                           |
| <b>916158</b>  | <b>916293</b>  | <b>60</b>    | <b>135</b>     | Internal to JHP0834                           |
| <b>916170</b>  | <b>916439</b>  | <b>77</b>    | <b>269</b>     | 5' region of JHP0834 and 3' region of JHP0835 |
| <b>916219</b>  | <b>916354</b>  | <b>84</b>    | <b>135</b>     | Internal to JHP0834                           |
| <b>916305</b>  | <b>916439</b>  | <b>48</b>    | <b>134</b>     | 5' region of JHP0834 and 3' region of JHP0835 |
| <b>916354</b>  | <b>916488</b>  | <b>28</b>    | <b>134</b>     | 5' region of JHP0834 and 3' region of JHP0835 |
| 924446         | 924539         | 29           | 93             |                                               |
| 924449         | 924611         | 26           | 162            |                                               |
| 924542         | 924611         | 79           | 69             |                                               |
| 930683         | 930990         | 145          | 307            |                                               |
| 930829         | 931136         | 47           | 307            |                                               |
| 932716         | 934327         | 25           | 1611           |                                               |
| 946587         | 946641         | 27           | 54             |                                               |
| 956858         | 957325         | 467          | 467            |                                               |
| 962739         | 1473876        | 31           | 511137         |                                               |
| 985516         | 985528         | 38           | 12             |                                               |
| 985516         | 985540         | 26           | 24             |                                               |
| <b>1026424</b> | <b>1026439</b> | <b>89</b>    | <b>15</b>      | Internal to JHP0928                           |
| <b>1026424</b> | <b>1026454</b> | <b>74</b>    | <b>30</b>      | Internal to JHP0928                           |
| <b>1026424</b> | <b>1026469</b> | <b>59</b>    | <b>45</b>      | Internal to JHP0928                           |
| <b>1026424</b> | <b>1026484</b> | <b>44</b>    | <b>60</b>      | Internal to JHP0928                           |
| <b>1026424</b> | <b>1026499</b> | <b>29</b>    | <b>75</b>      | Internal to JHP0928                           |
| 1031674        | 1049499        | 35           | 17825          |                                               |
| 1044359        | 1056646        | 24           | 12287          |                                               |

| Chromosome     | Chromosome     | Length of    | Distance       | Sequences                         |
|----------------|----------------|--------------|----------------|-----------------------------------|
| location of    | location of    | Repeat       | between repeat | flanked by paired repeats         |
| repeat 1       | repeat 2       | sequence, bp | sequences, bp  | in recombination hotspots*        |
| 1048026        | 1048064        | 47           | 38             |                                   |
| 1055201        | 1541529        | 44           | 486328         |                                   |
| 1055246        | 1541574        | 63           | 486328         |                                   |
| 1055342        | 1541670        | 30           | 486328         |                                   |
| 1055440        | 1541768        | 64           | 486328         |                                   |
| 1055507        | 1541835        | 44           | 486328         |                                   |
| 1055645        | 1541973        | 38           | 486328         |                                   |
| 1055685        | 1542013        | 40           | 486328         |                                   |
| 1057086        | 1057108        | 24           | 22             |                                   |
| 1057086        | 1426901        | 24           | 369815         |                                   |
| 1057086        | 1426924        | 4051         | 369838         |                                   |
| 1057086        | 1426946        | 24           | 369860         |                                   |
| 1057088        | 1426888        | 29           | 369800         |                                   |
| 1057092        | 1426915        | 25           | 369823         |                                   |
| 1057107        | 1426900        | 25           | 369793         |                                   |
| 1057107        | 1426923        | 25           | 369816         |                                   |
| <b>1060964</b> | <b>1060981</b> | <b>36</b>    | <b>17</b>      | JHP0951/JHP0952 intergenic region |
| 1060964        | 1430819        | 36           | 369855         |                                   |
| 1060981        | 1430802        | 36           | 369821         |                                   |
| <b>1061078</b> | <b>1061086</b> | <b>67</b>    | <b>8</b>       | 5' region of JHP0952              |
| <b>1061078</b> | <b>1061094</b> | <b>59</b>    | <b>16</b>      | 5' region of JHP0952              |
| <b>1061078</b> | <b>1061102</b> | <b>51</b>    | <b>24</b>      | 5' region of JHP0952              |
| <b>1061078</b> | <b>1061110</b> | <b>43</b>    | <b>32</b>      | 5' region of JHP0952              |
| <b>1061078</b> | <b>1061118</b> | <b>35</b>    | <b>40</b>      | 5' region of JHP0952              |
| <b>1061078</b> | <b>1061126</b> | <b>27</b>    | <b>48</b>      | 5' region of JHP0952              |
| 1061078        | 1430924        | 51           | 369846         |                                   |
| 1061078        | 1430932        | 43           | 369854         |                                   |
| 1061078        | 1430940        | 35           | 369862         |                                   |
| 1061078        | 1430948        | 27           | 369870         |                                   |
| 1061086        | 1430916        | 59           | 369830         |                                   |
| 1061094        | 1430916        | 74           | 369822         |                                   |
| 1061102        | 1430916        | 51           | 369814         |                                   |
| 1061110        | 1430916        | 43           | 369806         |                                   |

| Chromosome     | Chromosome     | Length of    | Distance       | Sequences                  |
|----------------|----------------|--------------|----------------|----------------------------|
| location of    | location of    | Repeat       | between repeat | flanked by paired repeats  |
| repeat 1       | repeat 2       | sequence, bp | sequences, bp  | in recombination hotspots* |
| 1061118        | 1430916        | 35           | 369798         |                            |
| 1061126        | 1430916        | 27           | 369790         |                            |
| 1061174        | 1430974        | 28           | 369800         |                            |
| 1061174        | 1430982        | 28           | 369808         |                            |
| 1061174        | 1430990        | 28           | 369816         |                            |
| 1061174        | 1430998        | 28           | 369824         |                            |
| 1061174        | 1431006        | 28           | 369832         |                            |
| 1061174        | 1431014        | 28           | 369840         |                            |
| 1061174        | 1431022        | 25           | 369848         |                            |
| 1061176        | 1430968        | 26           | 369792         |                            |
| 1061213        | 1431054        | 44           | 369841         |                            |
| 1061274        | 1431116        | 158          | 369842         |                            |
| <b>1061290</b> | <b>1061302</b> | <b>130</b>   | <b>125'</b>    | region of JHP0953          |
| <b>1061290</b> | <b>1061314</b> | <b>118</b>   | <b>245'</b>    | region of JHP0953          |
| <b>1061290</b> | <b>1061326</b> | <b>106</b>   | <b>365'</b>    | region of JHP0953          |
| <b>1061290</b> | <b>1061338</b> | <b>94</b>    | <b>485'</b>    | region of JHP0953          |
| <b>1061290</b> | <b>1061350</b> | <b>82</b>    | <b>605'</b>    | region of JHP0953          |
| <b>1061290</b> | <b>1061362</b> | <b>70</b>    | <b>725'</b>    | region of JHP0953          |
| <b>1061290</b> | <b>1061374</b> | <b>58</b>    | <b>845'</b>    | region of JHP0953          |
| <b>1061290</b> | <b>1061386</b> | <b>46</b>    | <b>965'</b>    | region of JHP0953          |
| <b>1061290</b> | <b>1061398</b> | <b>34</b>    | <b>1085'</b>   | region of JHP0953          |
| 1061290        | 1431144        | 142          | 369854         |                            |
| 1061290        | 1431156        | 138          | 369866         |                            |
| 1061290        | 1431168        | 126          | 369878         |                            |
| 1061290        | 1431180        | 114          | 369890         |                            |
| 1061290        | 1431192        | 102          | 369902         |                            |
| 1061290        | 1431204        | 90           | 369914         |                            |
| 1061290        | 1431216        | 78           | 369926         |                            |
| 1061290        | 1431228        | 66           | 369938         |                            |
| 1061290        | 1431240        | 54           | 369950         |                            |
| 1061290        | 1431252        | 42           | 369962         |                            |
| 1061290        | 1431264        | 30           | 369974         |                            |
| 1061302        | 1431132        | 130          | 369830         |                            |

| Chromosome     | Chromosome     | Length of    | Distance       | Sequences                                     |
|----------------|----------------|--------------|----------------|-----------------------------------------------|
| location of    | location of    | Repeat       | between repeat | flanked by paired repeats                     |
| repeat 1       | repeat 2       | sequence, bp | sequences, bp  | in recombination hotspots*                    |
| 1061314        | 1431132        | 118          | 369818         |                                               |
| 1061326        | 1431132        | 106          | 369806         |                                               |
| 1061338        | 1431132        | 94           | 369794         |                                               |
| 1061350        | 1431132        | 82           | 369782         |                                               |
| 1061362        | 1431132        | 70           | 369770         |                                               |
| 1061374        | 1431132        | 58           | 369758         |                                               |
| 1061386        | 1431132        | 46           | 369746         |                                               |
| 1061398        | 1431132        | 34           | 369734         |                                               |
| 1061466        | 1431318        | 80           | 369852         |                                               |
| 1063911        | 1436342        | 886          | 372431         |                                               |
| 1064940        | 1437384        | 30           | 372444         |                                               |
| 1071212        | 1071221        | 35           | 9              |                                               |
| 1071212        | 1071230        | 26           | 18             |                                               |
| 1112076        | 1112097        | 67           | 21             |                                               |
| 1112076        | 1112118        | 46           | 42             |                                               |
| 1112076        | 1112139        | 25           | 63             |                                               |
| 1143346        | 1577744        | 29           | 434398         |                                               |
| <b>1143730</b> | <b>1145066</b> | <b>26</b>    | <b>1336</b>    | 3' region of JHP1031 and 5' region of JHP1032 |
| <b>1144103</b> | <b>1145439</b> | <b>27</b>    | <b>1336</b>    | 3' region of JHP1031 and 5' region of JHP1032 |
| <b>1144131</b> | <b>1145467</b> | <b>36</b>    | <b>1336</b>    | 3' region of JHP1031 and 5' region of JHP1032 |
| <b>1144168</b> | <b>1145504</b> | <b>453</b>   | <b>1336</b>    | 3' region of JHP1031 and 5' region of JHP1032 |
| <b>1144612</b> | <b>1145943</b> | <b>67</b>    | <b>1331</b>    | JHP1032                                       |
| 1153029        | 1462523        | 25           | 309494         |                                               |
| 1156268        | 1156334        | 47           | 66             |                                               |
| 1157968        | 1159936        | 44           | 1968           |                                               |
| 1187563        | 1462581        | 310          | 275018         |                                               |
| 1187874        | 1462892        | 25           | 275018         |                                               |
| 1187900        | 1462918        | 431          | 275018         |                                               |
| 1188332        | 1463350        | 1693         | 275018         |                                               |
| 1196645        | 1446299        | 29           | 249654         |                                               |
| 1204491        | 1204500        | 24           | 9              |                                               |
| 1224655        | 1297046        | 27           | 72391          |                                               |
| <b>1238368</b> | <b>1238389</b> | <b>93</b>    | <b>21</b>      | Internal to JHP1113                           |

| Chromosome  | Chromosome  | Length of    | Distance       | Sequences                                              |
|-------------|-------------|--------------|----------------|--------------------------------------------------------|
| location of | location of | Repeat       | between repeat | flanked by paired repeats                              |
| repeat 1    | repeat 2    | sequence, bp | sequences, bp  | in recombination hotspots*                             |
| 1238368     | 1238410     | 72           | 42             | Internal to JHP1113                                    |
| 1238368     | 1238431     | 51           | 63             | Internal to JHP1113                                    |
| 1238368     | 1238452     | 30           | 84             | Internal to JHP1113                                    |
| 1296449     | 1296702     | 24           | 253            | Noncoding region upstream of JHP1164 ( <i>babB</i> )   |
| 1296559     | 1296744     | 26           | 185            | Noncoding region upstream of JHP1164 ( <i>babB</i> )   |
| 1296593     | 1296609     | 39           | 16             | Noncoding region upstream of JHP1164 ( <i>babB</i> )   |
| 1296778     | 1296793     | 49           | 15             | Noncoding region upstream of JHP1164 ( <i>babB</i> )   |
| 1296778     | 1296808     | 34           | 30             | Noncoding region upstream of JHP1164 ( <i>babB</i> )   |
| 1299213     | 1299223     | 49           | 10             | Noncoding region downstream of JHP1164 ( <i>babB</i> ) |
| 1299213     | 1299233     | 39           | 20             | Noncoding region downstream of JHP1164 ( <i>babB</i> ) |
| 1299213     | 1299243     | 29           | 30             | Noncoding region downstream of JHP1164 ( <i>babB</i> ) |
| 1304751     | 1304763     | 80           | 12             | Internal to JHP1171                                    |
| 1304751     | 1304775     | 68           | 24             | Internal to JHP1171                                    |
| 1304751     | 1304787     | 56           | 36             | Internal to JHP1171                                    |
| 1304751     | 1304799     | 44           | 48             | Internal to JHP1171                                    |
| 1304751     | 1304811     | 32           | 60             | Internal to JHP1171                                    |
| 1309687     | 1309702     | 24           | 15             |                                                        |
| 1360233     | 1360241     | 99           | 8              | JHP1241/JHP1242 intergenic region                      |
| 1360233     | 1360249     | 91           | 16             | JHP1241/JHP1242 intergenic region                      |
| 1360233     | 1360257     | 83           | 24             | JHP1241/JHP1242 intergenic region                      |
| 1360233     | 1360265     | 75           | 32             | JHP1241/JHP1242 intergenic region                      |
| 1360233     | 1360273     | 67           | 40             | JHP1241/JHP1242 intergenic region                      |
| 1360233     | 1360281     | 59           | 48             | JHP1241/JHP1242 intergenic region                      |
| 1360233     | 1360289     | 51           | 56             | JHP1241/JHP1242 intergenic region                      |
| 1360233     | 1360297     | 43           | 64             | JHP1241/JHP1242 intergenic region                      |
| 1360233     | 1360305     | 35           | 72             | JHP1241/JHP1242 intergenic region                      |
| 1360233     | 1360313     | 27           | 80             | JHP1241/JHP1242 intergenic region                      |
| 1388068     | 1390257     | 50           | 2189           |                                                        |
| 1393696     | 1393782     | 88           | 86             |                                                        |
| 1426888     | 1426926     | 29           | 38             | JHP1299/JHP1300 intergenic region                      |

| Chromosome  | Chromosome  | Length of    | Distance       | Sequences                            |
|-------------|-------------|--------------|----------------|--------------------------------------|
| location of | location of | Repeat       | between repeat | flanked by paired repeats            |
| repeat 1    | repeat 2    | sequence, bp | sequences, bp  | in recombination hotspots*           |
| 1426892     | 1426915     | 33           | 23             | JHP1299/JHP1300 intergenic region    |
| 1426900     | 1426945     | 25           | 45             | JHP1299/JHP1300 intergenic region    |
| 1426915     | 1426930     | 25           | 15             | JHP1299/JHP1300 intergenic region    |
| 1426923     | 1426945     | 25           | 22             | JHP1299/JHP1300 intergenic region    |
| 1430802     | 1430819     | 36           | 17             | Noncoding region upstream of JHP1300 |
| 1430916     | 1430924     | 51           | 8              | Internal to JHP1300                  |
| 1430916     | 1430932     | 43           | 16             | Internal to JHP1300                  |
| 1430916     | 1430940     | 35           | 24             | Internal to JHP1300                  |
| 1430916     | 1430948     | 27           | 32             | Internal to JHP1300                  |
| 1430968     | 1430976     | 71           | 8              | Internal to JHP1300                  |
| 1430968     | 1430984     | 63           | 16             | Internal to JHP1300                  |
| 1430968     | 1430992     | 55           | 24             | Internal to JHP1300                  |
| 1430968     | 1431000     | 47           | 32             | Internal to JHP1300                  |
| 1430968     | 1431008     | 39           | 40             | Internal to JHP1300                  |
| 1430968     | 1431016     | 31           | 48             | Internal to JHP1300                  |
| 1431132     | 1431144     | 150          | 12             | Internal to JHP1300                  |
| 1431132     | 1431156     | 138          | 24             | Internal to JHP1300                  |
| 1431132     | 1431168     | 126          | 36             | Internal to JHP1300                  |
| 1431132     | 1431180     | 114          | 48             | Internal to JHP1300                  |
| 1431132     | 1431192     | 102          | 60             | Internal to JHP1300                  |
| 1431132     | 1431204     | 90           | 72             | Internal to JHP1300                  |
| 1431132     | 1431216     | 78           | 84             | Internal to JHP1300                  |
| 1431132     | 1431228     | 66           | 96             | Internal to JHP1300                  |
| 1431132     | 1431240     | 54           | 108            | Internal to JHP1300                  |
| 1431132     | 1431252     | 42           | 120            | Internal to JHP1300                  |
| 1431132     | 1431264     | 30           | 132            | Internal to JHP1300                  |
| 1449541     | 1450046     | 27           | 505            |                                      |
| 1449581     | 1450084     | 25           | 503            |                                      |
| 1455378     | 1455695     | 40           | 317            |                                      |
| 1455378     | 1562663     | 25           | 107285         |                                      |
| 1455404     | 1562689     | 32           | 107285         |                                      |
| 1455469     | 1562753     | 107          | 107284         |                                      |
| 1455577     | 1455898     | 27           | 321            |                                      |

| Chromosome     | Chromosome     | Length of    | Distance       | Sequences                                     |
|----------------|----------------|--------------|----------------|-----------------------------------------------|
| location of    | location of    | Repeat       | between repeat | flanked by paired repeats                     |
| repeat 1       | repeat 2       | sequence, bp | sequences, bp  | in recombination hotspots*                    |
| 1455577        | 1562861        | 35           | 107284         |                                               |
| 1455693        | 1562661        | 27           | 106968         |                                               |
| 1455893        | 1562856        | 32           | 106963         |                                               |
| 1455926        | 1562889        | 28           | 106963         |                                               |
| 1485503        | 1622989        | 25           | 137486         |                                               |
| 1495781        | 1496381        | 24           | 600            |                                               |
| <b>1542391</b> | <b>1543090</b> | <b>24</b>    | <b>699</b>     | JHP1408/1409 intergenic regions               |
| <b>1542433</b> | <b>1543138</b> | <b>34</b>    | <b>705</b>     | JHP1408/1409 intergenic regions               |
| <b>1542491</b> | <b>1543197</b> | <b>49</b>    | <b>706</b>     | JHP1408/1409 intergenic regions               |
| <b>1542541</b> | <b>1543247</b> | <b>43</b>    | <b>706</b>     | JHP1408/1409 intergenic regions               |
| <b>1542870</b> | <b>1543280</b> | <b>41</b>    | <b>410</b>     | JHP1408/1409 intergenic regions               |
| <b>1562959</b> | <b>1563571</b> | <b>616</b>   | <b>612</b>     | Internal to JHP1422 ( <i>hsdS</i> )           |
| <b>1563020</b> | <b>1564244</b> | <b>45</b>    | <b>1224</b>    | Internal to JHP1422 ( <i>hsdS</i> )           |
| <b>1563494</b> | <b>1564724</b> | <b>31</b>    | <b>1230</b>    | Internal to JHP1422 ( <i>hsdS</i> )           |
| <b>1563632</b> | <b>1564244</b> | <b>45</b>    | <b>612</b>     | Internal to JHP1422 ( <i>hsdS</i> )           |
| <b>1564106</b> | <b>1564724</b> | <b>31</b>    | <b>618</b>     | Internal to JHP1422 ( <i>hsdS</i> )           |
| <b>1618927</b> | <b>1620142</b> | <b>26</b>    | <b>1215</b>    | 5' region of JHP1469 and 3' region of JHP1470 |
| <b>1618993</b> | <b>1620208</b> | <b>53</b>    | <b>1215</b>    | 5' region of JHP1469 and 3' region of JHP1470 |
| <b>1619086</b> | <b>1620301</b> | <b>53</b>    | <b>1215</b>    | 5' region of JHP1469 and 3' region of JHP1470 |
| <b>1619173</b> | <b>1620388</b> | <b>44</b>    | <b>1215</b>    | 5' region of JHP1469 and 3' region of JHP1470 |
| <b>1619283</b> | <b>1620498</b> | <b>60</b>    | <b>1215</b>    | 5' region of JHP1469 and 3' region of JHP1470 |
| <b>1619470</b> | <b>1620685</b> | <b>119</b>   | <b>1215</b>    | 5' region of JHP1469 and 3' region of JHP1470 |
| <b>1619755</b> | <b>1620964</b> | <b>46</b>    | <b>1209</b>    | 5' region of JHP1469 and 3' region of JHP1470 |
| <b>1640565</b> | <b>1643316</b> | <b>26</b>    | <b>2751</b>    | JHP1493-1495                                  |
| <b>1641509</b> | <b>1643767</b> | <b>43</b>    | <b>2258</b>    | JHP1493-1495                                  |
| <b>1641557</b> | <b>1641564</b> | <b>87</b>    | <b>7</b>       | JHP1493/JHP1494 intergenic region             |
| <b>1641557</b> | <b>1641571</b> | <b>80</b>    | <b>14</b>      | JHP1493/JHP1494 intergenic region             |
| <b>1641557</b> | <b>1641578</b> | <b>73</b>    | <b>21</b>      | JHP1493/JHP1494 intergenic region             |
| <b>1641557</b> | <b>1641585</b> | <b>66</b>    | <b>28</b>      | JHP1493/JHP1494 intergenic region             |
| <b>1641557</b> | <b>1641592</b> | <b>59</b>    | <b>35</b>      | JHP1493/JHP1494 intergenic region             |
| <b>1641557</b> | <b>1641599</b> | <b>52</b>    | <b>42</b>      | JHP1493/JHP1494 intergenic region             |
| <b>1641557</b> | <b>1641606</b> | <b>45</b>    | <b>49</b>      | JHP1493/JHP1494 intergenic region             |
| <b>1641557</b> | <b>1641613</b> | <b>38</b>    | <b>56</b>      | JHP1493/JHP1494 intergenic region             |



| <b>Chromosome</b>  | <b>Chromosome</b>  | <b>Length of</b>    | <b>Distance</b>       | <b>Sequences</b>                  |
|--------------------|--------------------|---------------------|-----------------------|-----------------------------------|
| <b>location of</b> | <b>location of</b> | <b>Repeat</b>       | <b>between repeat</b> | <b>flanked by paired repeats</b>  |
| <b>repeat 1</b>    | <b>repeat 2</b>    | <b>sequence, bp</b> | <b>sequences, bp</b>  | <b>in recombination hotspots*</b> |
| <b>1641557</b>     | <b>1641620</b>     | <b>31</b>           | <b>63</b>             | JHP1493/JHP1494 intergenic region |
| <b>1641557</b>     | <b>1641627</b>     | <b>24</b>           | <b>70</b>             | JHP1493/JHP1494 intergenic region |

Bold font indicates paired repeats fall within a recombination hotspot, defined a region  $\leq 5,000$  bp containing  $\geq 4$  paired identical repeat sequences

\* Gene designations obtained from the TIGR database ([www.tigr.org](http://www.tigr.org))
