# Supplementary material
Source: PubMed Central journal article supplement (PMC263856)

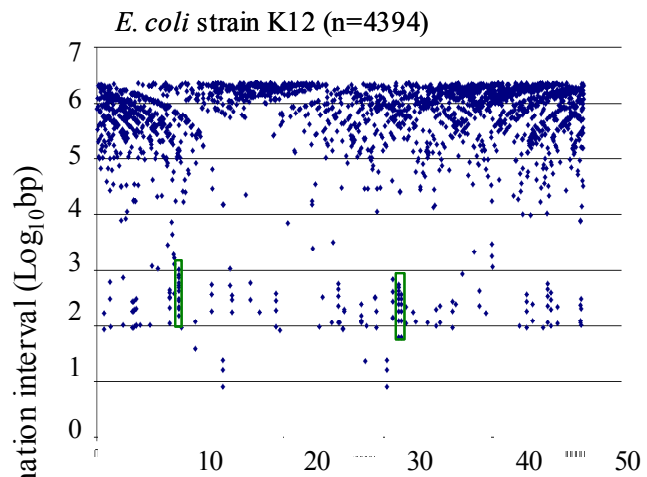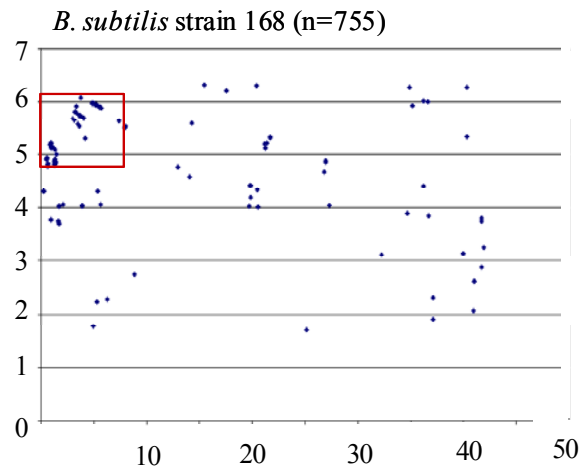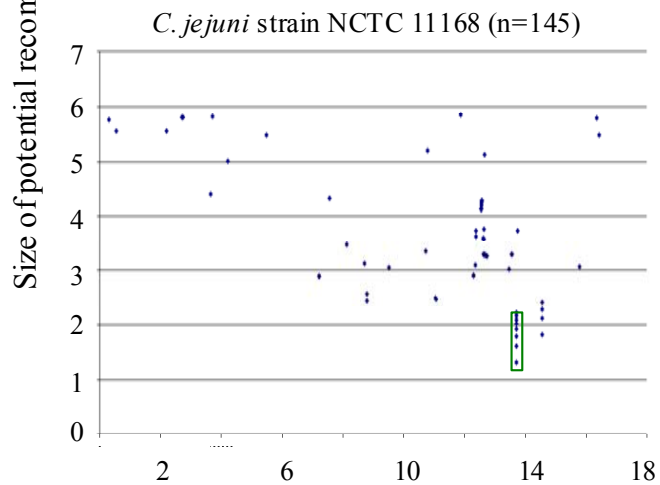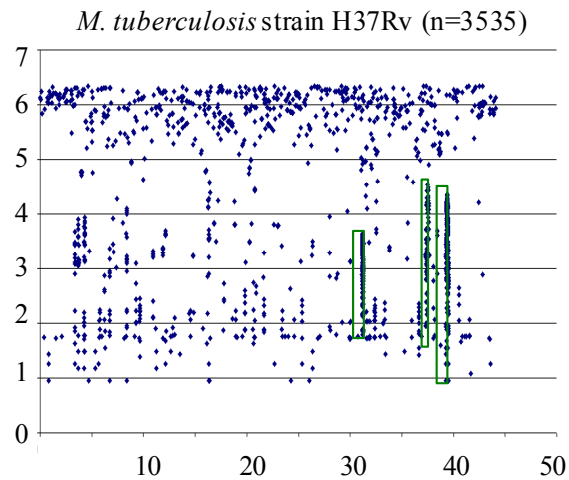

Chromosomal location (x 100,000 bp) of middle nucleotide between paired identical repeat sequences

Supplement: pnas_100_23_13579__10.pdf [file pnas_100_23_13579__10.pdf]

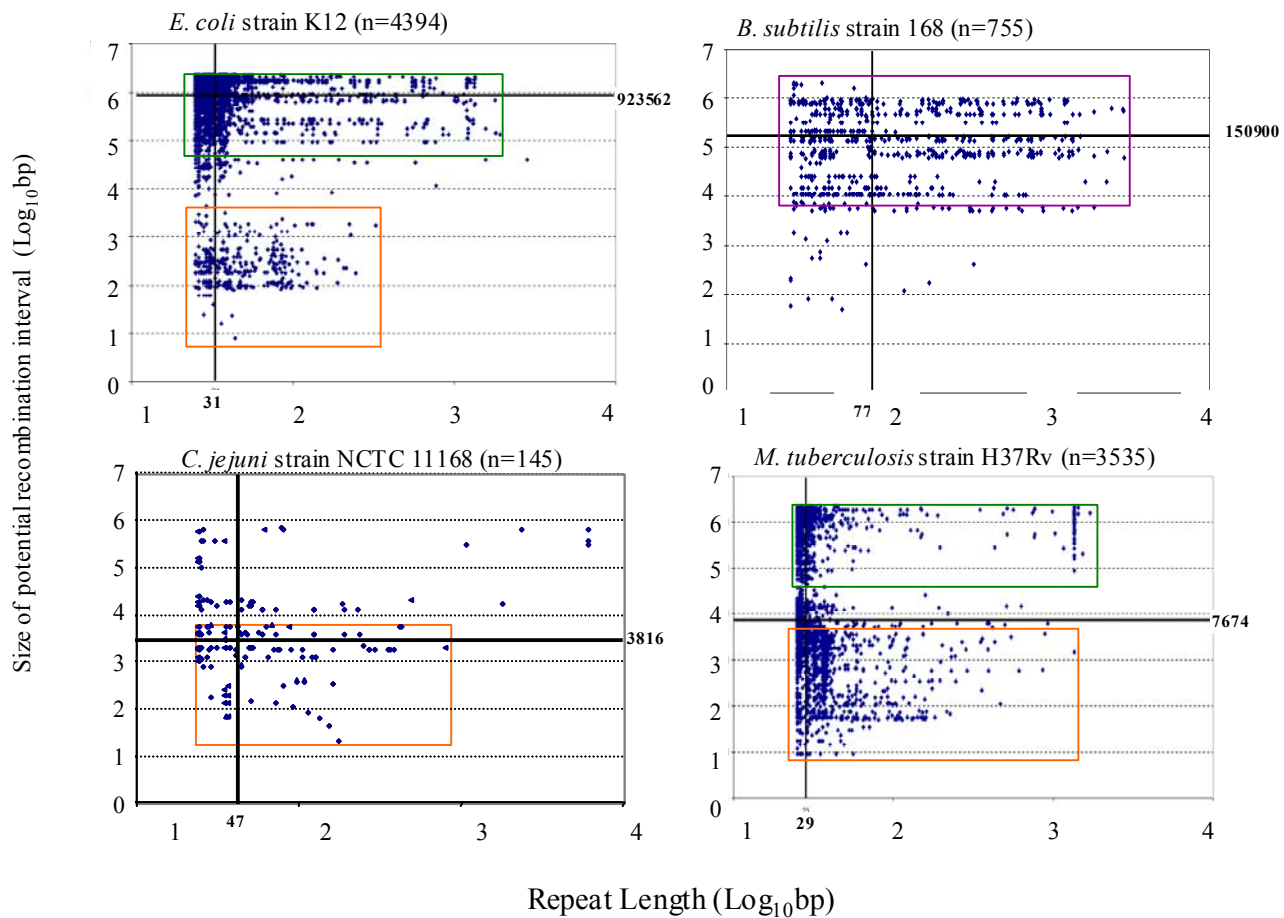

Supplement: pnas_100_23_13579__8.pdf [file pnas_100_23_13579__8.pdf]
